# Supplementary material
Source: PubMed Central journal article supplement (PMC2909651)
Supplement: NIHMS216716-supplement-1_si_001.pdf [file NIHMS216716-supplement-1_si_001.pdf]

---

## **Supporting Information**

# **Fundamental Reaction Pathways for Cytochrome P450-catalyzed 5'-Hydroxylation and N-Demethylation of Nicotine**

Dongmei Li,<sup>a,b</sup> Yong Wang,<sup>a</sup> Keli Han,<sup>a,\*</sup> and Chang-Guo Zhan<sup>b,\*</sup>

*<sup>a</sup>State Key Laboratory of Molecular Reaction Dynamics, Dalian Institute of  
Chemical Physics, Chinese Academy of Sciences, Dalian 116023, People's  
Republic of China and <sup>b</sup>Department of Pharmaceutical Sciences, College of  
Pharmacy, University of Kentucky, 725 Rose Street, Lexington, Kentucky  
40536*

### **Correspondence:**

Chang-Guo Zhan, Ph.D.  
Professor  
Department of Pharmaceutical Sciences  
College of Pharmacy  
University of Kentucky  
725 Rose Street  
Lexington, KY 40536  
TEL: 859-323-3943  
FAX: 859-323-3575  
E-mail: [zhan@uky.edu](mailto:zhan@uky.edu)

---

\* Corresponding authors. E-mail: [klhan@dicp.ac.cn](mailto:klhan@dicp.ac.cn) and [zhan@uky.edu](mailto:zhan@uky.edu)

---

**Supporting Information Available:** Ten tables showing the energies, free energies, Mulliken spin densities, imaginary frequencies, and Cartesian coordinates in the two reaction pathways. This material is available free of charge via the Internet at <http://pubs.acs.org>.

**Table of Contents:**

**Table S1.** Calculated energies for nicotine hydroxylation by Cpd I with zero-point corrections. All relative values are in kcal/mol relative to the reactant <sup>4</sup>RC. (B1: LACVP (6-31G\*); B2: LACV3P+\* (6-311+G\*)).

**Table S2.** Calculated energies with zero-point corrections for *N*-(hydroxymethyl)nornicotine decomposition. All relative values are in kcal/mol relative to the reactant RC.

**Table S3.** Calculated energies for the rate-determining step of nicotine hydroxylation by Cpd I with zero-point corrections using different functionals. All data were calculated at the B2//B1 level. All relative values are in kcal/mol relative to the reactant <sup>4</sup>RC.

**Table S4.** Calculated free energies for nicotine hydroxylation by Cpd I with thermal corrections. All relative values are in kcal/mol relative to the reactant <sup>4</sup>RC. (B1: LACVP (6-31G\*); B2: LACV3P+\* (6-311+G\*)).

**Table S5.** Calculated free energies with thermal corrections for *N*-(hydroxymethyl)nornicotine decomposition. All relative values are in kcal/mol relative to the reactant RC.

**Table S6.** Mulliken atomic spin densities of key moieties of nicotine hydroxylation by Cpd I. All data were computed at the B3LYP/B1 level.

**Table S7.** Imaginary frequencies of all transition states.

**Table S8.** Cartesian coordinates for 5'-hydroxylation by Cpd I. The geometries were optimized at the B3LYP/B1 level.

**Table S9.** Cartesian coordinates for *N*-methylhydroxylation by Cpd I. The geometries were optimized at the B3LYP/B1 level.

**Table S10.** Cartesian coordinates for *N*-(hydroxymethyl)nornicotine decomposition.

**Table S1.** Calculated energies for nicotine hydroxylation by Cpd I with zero-point corrections. All relative values are in kcal/mol relative to the reactant <sup>4</sup>RC. (B1: LACVP (6-31G\*); B2: LACV3P+\* (6-311+G\*)).

|                                | B1           |                  | B2//B1       |                  | B2//B1<br>+ solv. |                  | B2//B1<br>+ 2NH--S |                  | B2//B1<br>+ 2NH--S + solv. |                  |
|--------------------------------|--------------|------------------|--------------|------------------|-------------------|------------------|--------------------|------------------|----------------------------|------------------|
|                                | E (a.u.)     | E <sub>rel</sub> | E (a.u.)     | E <sub>rel</sub> | E (a.u.)          | E <sub>rel</sub> | E (a.u.)           | E <sub>rel</sub> | E (a.u.)                   | E <sub>rel</sub> |
| <b>5'-hydroxylation</b>        |              |                  |              |                  |                   |                  |                    |                  |                            |                  |
| <sup>4</sup> RC                | -2084.653464 | <b>0.0</b>       | -2085.085604 | <b>0.0</b>       | -2085.160352      | <b>0.0</b>       | -2198.226500       | <b>0.0</b>       | -2198.307668               | <b>0.0</b>       |
| <sup>2</sup> RC                | -2084.653882 | <b>-0.3</b>      | -2085.086061 | <b>-0.3</b>      | -2085.160568      | <b>-0.1</b>      | -2198.226726       | <b>-0.1</b>      | -2198.307602               | <b>0.0</b>       |
| <sup>4</sup> TS <sub>H</sub>   | -2084.615741 | <b>23.7</b>      | -2085.050248 | <b>22.2</b>      | -2085.125243      | <b>22.0</b>      | -2198.186897       | <b>24.9</b>      | -2198.267327               | <b>25.3</b>      |
| <sup>2</sup> TS <sub>H</sub>   | -2084.616421 | <b>23.2</b>      | -2085.048091 | <b>23.5</b>      | -2085.125315      | <b>22.0</b>      | -2198.188016       | <b>24.1</b>      | -2198.270516               | <b>23.3</b>      |
| <sup>4</sup> IM                | -2084.629813 | <b>14.8</b>      | -2085.064494 | <b>13.2</b>      | -2085.141868      | <b>11.6</b>      | -2198.204631       | <b>13.7</b>      | -2198.286579               | <b>13.2</b>      |
| <sup>2</sup> IM                | -2084.630306 | <b>14.5</b>      | -2085.065185 | <b>12.8</b>      | -2085.14210       | <b>11.5</b>      | -2198.202519       | <b>15.0</b>      | -2198.284410               | <b>14.6</b>      |
| <sup>4</sup> TS <sub>reb</sub> | -2084.619181 | <b>21.5</b>      | -2085.061588 | <b>15.1</b>      | -2085.139177      | <b>13.3</b>      | -2198.203053       | <b>14.7</b>      | -2198.285037               | <b>14.2</b>      |
| <sup>2</sup> TS <sub>reb</sub> | -2084.625860 | <b>17.3</b>      | -2085.060916 | <b>15.5</b>      | -2085.140353      | <b>12.5</b>      | -2198.196672       | <b>18.7</b>      | -2198.279707               | <b>17.5</b>      |
| <sup>4</sup> PC                | -2084.719385 | <b>-41.4</b>     | -2085.155329 | <b>-43.8</b>     | -2085.236512      | <b>-47.8</b>     | -2198.301310       | <b>-46.9</b>     | -2198.386925               | <b>-49.7</b>     |
| <sup>2</sup> PC                | -2084.719554 | <b>-41.5</b>     | -2085.151152 | <b>-41.1</b>     | -2085.228886      | <b>-43.0</b>     | -2198.291085       | <b>-40.5</b>     | -2198.373690               | <b>-41.4</b>     |
| <b>N-methylhydroxylation</b>   |              |                  |              |                  |                   |                  |                    |                  |                            |                  |
| <sup>4</sup> RC                | -2084.653638 | <b>0.0</b>       | -2085.085488 | <b>0.0</b>       | -2085.160501      | <b>0.0</b>       | -2198.226654       | <b>0.0</b>       | -2198.307660               | <b>0.0</b>       |
| <sup>2</sup> RC                | -2084.653973 | <b>-0.2</b>      | -2085.085954 | <b>-0.3</b>      | -2085.160711      | <b>-0.1</b>      | -2198.226838       | <b>-0.1</b>      | -2198.307875               | <b>-0.1</b>      |
| <sup>4</sup> TS <sub>H</sub>   | -2084.610639 | <b>27.0</b>      | -2085.045765 | <b>24.9</b>      | -2085.120393      | <b>25.2</b>      | -2198.184672       | <b>26.3</b>      | -2198.265006               | <b>26.8</b>      |
| <sup>2</sup> TS <sub>H</sub>   | -2084.610577 | <b>27.0</b>      | -2085.043059 | <b>26.6</b>      | -2085.119253      | <b>25.9</b>      | -2198.184115       | <b>26.7</b>      | -2198.266050               | <b>26.1</b>      |
| <sup>4</sup> IM                | -2084.622022 | <b>19.8</b>      | -2085.057040 | <b>17.9</b>      | -2085.133874      | <b>16.7</b>      | -2198.197970       | <b>18.0</b>      | -2198.278676               | <b>18.2</b>      |
| <sup>2</sup> IM                | -2084.622336 | <b>19.6</b>      | -2085.057562 | <b>17.5</b>      | -2085.133459      | <b>17.0</b>      | -2198.196658       | <b>18.8</b>      | -2198.277560               | <b>18.9</b>      |
| <sup>4</sup> TS <sub>reb</sub> | -2084.610579 | <b>27.0</b>      | -2085.052677 | <b>20.6</b>      | -2085.129428      | <b>19.5</b>      | -2198.193931       | <b>20.5</b>      | -2198.275743               | <b>20.0</b>      |
| <sup>2</sup> TS <sub>reb</sub> | -2084.614711 | <b>24.4</b>      | -2085.050679 | <b>21.8</b>      | -2085.128463      | <b>20.1</b>      | -2198.189957       | <b>23.0</b>      | -2198.271879               | <b>22.5</b>      |
| <sup>4</sup> PC                | -2084.712711 | <b>-37.1</b>     | -2085.148607 | <b>-39.6</b>     | -2085.231053      | <b>-44.3</b>     | -2198.295390       | <b>-43.1</b>     | -2198.382016               | <b>-46.7</b>     |
| <sup>2</sup> PC                | -2084.713981 | <b>-37.9</b>     | -2085.145408 | <b>-37.6</b>     | -2085.223606      | <b>-39.6</b>     | -2198.284576       | <b>-36.3</b>     | -2198.367387               | <b>-37.5</b>     |

**Table S2.** Calculated energies with zero-point corrections for *N*-(hydroxymethyl)nornicotine decomposition. All relative values are in kcal/mol relative to the reactant RC.

|                                                         | B1<br>(gas-phase) |                  | B2//B1<br>(gas-phase) |                  | B2//B1<br>+ solv. |                                                                               | B1<br>(gas-phase). |                  | B2//B1<br>(gas-phase) |                  | B2//B1<br>+ solv. |                  |
|---------------------------------------------------------|-------------------|------------------|-----------------------|------------------|-------------------|-------------------------------------------------------------------------------|--------------------|------------------|-----------------------|------------------|-------------------|------------------|
|                                                         | E (a.u.)          | E <sub>rel</sub> | E (a.u.)              | E <sub>rel</sub> | E (a.u.)          | E <sub>rel</sub>                                                              | E (a.u.)           | E <sub>rel</sub> | E (a.u.)              | E <sub>rel</sub> | E (a.u.)          | G <sub>rel</sub> |
| <b>protonated <i>N</i>-(hydroxymethyl)nornicotine</b>   |                   |                  |                       |                  |                   | <b>protonated <i>N</i>-(hydroxymethyl)nornicotine (with water assisted)</b>   |                    |                  |                       |                  |                   |                  |
| RC                                                      | -574.328461       | <b>0.0</b>       | -574.459799           | <b>0.0</b>       | -574.573897       | <b>0.0</b>                                                                    | -650.741517        | <b>0.0</b>       | -650.904537           | <b>0.0</b>       | -651.018336       | <b>0.0</b>       |
| TS                                                      | -574.257423       | <b>44.6</b>      | -574.389194           | <b>44.3</b>      | -574.502708       | <b>44.7</b>                                                                   | -650.684881        | <b>35.5</b>      | -650.846924           | <b>36.1</b>      | -650.958575       | <b>37.5</b>      |
| PC                                                      | -574.335110       | <b>-4.2</b>      | -574.469677           | <b>-6.2</b>      | -574.575934       | <b>-1.3</b>                                                                   | -650.745516        | <b>-2.5</b>      | -650.911611           | <b>-4.4</b>      | -651.013999       | <b>2.7</b>       |
| <b>deprotonated <i>N</i>-(hydroxymethyl)nornicotine</b> |                   |                  |                       |                  |                   | <b>deprotonated <i>N</i>-(hydroxymethyl)nornicotine (with water assisted)</b> |                    |                  |                       |                  |                   |                  |
| RC                                                      | -573.963926       | <b>0.0</b>       | -574.103559           | <b>0.0</b>       | -574.127107       | <b>0.0</b>                                                                    | -650.367029        | <b>0.0</b>       | -650.535255           | <b>0.0</b>       | -650.566379       | <b>0.0</b>       |
| TS                                                      | -573.902251       | <b>38.7</b>      | -574.040308           | <b>39.7</b>      | -574.080516       | <b>29.2</b>                                                                   | -650.337081        | <b>18.8</b>      | -650.506291           | <b>18.2</b>      | -650.550704       | <b>9.8</b>       |
| PC                                                      | -573.947412       | <b>10.4</b>      | -574.088480           | <b>9.5</b>       | -574.114062       | <b>8.2</b>                                                                    | -650.350449        | <b>10.4</b>      | -650.521920           | <b>8.4</b>       | -650.552079       | <b>9.0</b>       |

**Table S3.** Calculated energies for the rate-determining step of nicotine hydroxylation by Cpd I with zero-point corrections using different density functionals. All data were calculated at the B2//B1 level. All relative values are in kcal/mol relative to the reactant <sup>4</sup>RC.

|                              | BP86         |                  | BLYP         |                  | B3LYP*       |                  | B3LYP        |                  | B3PW91       |                  |
|------------------------------|--------------|------------------|--------------|------------------|--------------|------------------|--------------|------------------|--------------|------------------|
|                              | E (a.u.)     | E <sub>rel</sub> |
| <b>5'-hydroxylation</b>      |              |                  |              |                  |              |                  |              |                  |              |                  |
| <sup>4</sup> RC              | -2085.236408 | <b>0.0</b>       | -2084.472060 | <b>0.0</b>       | -2072.593132 | <b>0.0</b>       | -2085.085604 | <b>0.0</b>       | -2084.446659 | <b>0.0</b>       |
| <sup>2</sup> RC              | -2085.238034 | <b>-1.0</b>      | -2084.473617 | <b>-1.0</b>      | -2072.593913 | <b>-0.5</b>      | -2085.086061 | <b>-0.3</b>      | -2084.447163 | <b>-0.3</b>      |
| <sup>4</sup> TS <sub>H</sub> | -2085.211946 | <b>15.4</b>      | -2084.442044 | <b>18.8</b>      | -2072.559901 | <b>20.9</b>      | -2085.050248 | <b>22.2</b>      | -2084.414850 | <b>20.0</b>      |
| <sup>2</sup> TS <sub>H</sub> | -2085.209354 | <b>17.0</b>      | -2084.439924 | <b>20.2</b>      | -2072.555756 | <b>23.5</b>      | -2085.048091 | <b>23.5</b>      | -2084.410583 | <b>22.6</b>      |
| <b>N-methylhydroxylation</b> |              |                  |              |                  |              |                  |              |                  |              |                  |
| <sup>4</sup> RC              | -2085.236307 | <b>0.0</b>       | -2084.471937 | <b>0.0</b>       | -2072.593184 | <b>0.0</b>       | -2085.085488 | <b>0.0</b>       | -2084.446568 | <b>0.0</b>       |
| <sup>2</sup> RC              | -2085.237823 | <b>-1.0</b>      | -2084.473234 | <b>-0.8</b>      | -2072.593734 | <b>-0.3</b>      | -2085.085954 | <b>-0.3</b>      | -2084.447075 | <b>-0.3</b>      |
| <sup>4</sup> TS <sub>H</sub> | -2085.206243 | <b>18.9</b>      | -2084.437436 | <b>21.6</b>      | -2072.555510 | <b>23.6</b>      | -2085.045765 | <b>24.9</b>      | -2084.409665 | <b>23.2</b>      |
| <sup>2</sup> TS <sub>H</sub> | -2085.202848 | <b>21.0</b>      | -2084.434749 | <b>23.3</b>      | -2072.551003 | <b>26.5</b>      | -2085.043059 | <b>26.6</b>      | -2084.404932 | <b>26.1</b>      |

**Table S4.** Calculated free energies for nicotine hydroxylation by Cpd I with thermal corrections. All relative values are in kcal/mol relative to the reactant <sup>4</sup>RC. (B1: LACVP (6-31G\*); B2: LACV3P+\* (6-311+G\*)).

|                                | B1           |                  | B2//B1       |                  | B2//B1<br>+ solv. |                  | B2//B1<br>+ 2NH--S |                  | B2//B1<br>+ 2NH--S + solv. |                  |
|--------------------------------|--------------|------------------|--------------|------------------|-------------------|------------------|--------------------|------------------|----------------------------|------------------|
|                                | G (a.u.)     | G <sub>rel</sub> | G (a.u.)     | G <sub>rel</sub> | G (a.u.)          | G <sub>rel</sub> | G (a.u.)           | G <sub>rel</sub> | G (a.u.)                   | G <sub>rel</sub> |
| <b>5'-hydroxylation</b>        |              |                  |              |                  |                   |                  |                    |                  |                            |                  |
| <sup>4</sup> RC                | -2084.723935 | <b>0.0</b>       | -2085.156074 | <b>0.0</b>       | -2085.230822      | <b>0.0</b>       | -2198.29697        | <b>0.0</b>       | -2198.378138               | <b>0.0</b>       |
| <sup>2</sup> RC                | -2084.723489 | <b>0.3</b>       | -2085.155668 | <b>0.3</b>       | -2085.230175      | <b>0.4</b>       | -2198.296333       | <b>0.4</b>       | -2198.377209               | <b>0.6</b>       |
| <sup>4</sup> TS <sub>H</sub>   | -2084.683971 | <b>25.1</b>      | -2085.118478 | <b>23.6</b>      | -2085.193473      | <b>23.4</b>      | -2198.255127       | <b>26.3</b>      | -2198.335557               | <b>26.7</b>      |
| <sup>2</sup> TS <sub>H</sub>   | -2084.682903 | <b>25.7</b>      | -2085.114573 | <b>26.0</b>      | -2085.191797      | <b>24.5</b>      | -2198.254498       | <b>26.7</b>      | -2198.336998               | <b>25.8</b>      |
| <sup>4</sup> IM                | -2084.698274 | <b>16.1</b>      | -2085.132956 | <b>14.5</b>      | -2085.210330      | <b>12.9</b>      | -2198.273093       | <b>15.08</b>     | -2198.355041               | <b>14.5</b>      |
| <sup>2</sup> IM                | -2084.697842 | <b>16.4</b>      | -2085.132721 | <b>14.7</b>      | -2085.209636      | <b>13.3</b>      | -2198.270055       | <b>16.9</b>      | -2198.351946               | <b>16.4</b>      |
| <sup>4</sup> TS <sub>reb</sub> | -2084.686446 | <b>23.5</b>      | -2085.128853 | <b>17.1</b>      | -2085.206442      | <b>15.3</b>      | -2198.270318       | <b>16.7</b>      | -2198.352302               | <b>16.2</b>      |
| <sup>2</sup> TS <sub>reb</sub> | -2084.691415 | <b>20.4</b>      | -2085.126472 | <b>18.6</b>      | -2085.205909      | <b>15.6</b>      | -2198.270318       | <b>21.8</b>      | -2198.345263               | <b>20.6</b>      |
| <sup>4</sup> PC                | -2084.789788 | <b>-41.3</b>     | -2085.225732 | <b>-43.7</b>     | -2085.306915      | <b>-47.7</b>     | -2198.371713       | <b>-46.9</b>     | -2198.457328               | <b>-49.7</b>     |
| <sup>2</sup> PC                | -2084.789426 | <b>-41.1</b>     | -2085.221025 | <b>-40.8</b>     | -2085.298759      | <b>-42.6</b>     | -2198.360958       | <b>-40.2</b>     | -2198.443563               | <b>-41.1</b>     |
| <b>N-methylhydroxylation</b>   |              |                  |              |                  |                   |                  |                    |                  |                            |                  |
| <sup>4</sup> RC                | -2084.723059 | <b>0.0</b>       | -2085.154908 | <b>0.0</b>       | -2085.229921      | <b>0.0</b>       | -2198.296074       | <b>0.0</b>       | -2198.377080               | <b>0.0</b>       |
| <sup>2</sup> RC                | -2084.722801 | <b>-0.2</b>      | -2085.154783 | <b>0.1</b>       | -2085.229540      | <b>0.2</b>       | -2198.295667       | <b>0.3</b>       | -2198.376704               | <b>0.2</b>       |
| <sup>4</sup> TS <sub>H</sub>   | -2084.678800 | <b>31.6</b>      | -2085.113927 | <b>25.7</b>      | -2085.188555      | <b>26.0</b>      | -2198.252834       | <b>27.1</b>      | -2198.333168               | <b>27.6</b>      |
| <sup>2</sup> TS <sub>H</sub>   | -2084.677841 | <b>32.0</b>      | -2085.110323 | <b>28.0</b>      | -2085.186517      | <b>27.2</b>      | -2198.251379       | <b>28.0</b>      | -2198.333314               | <b>27.5</b>      |
| <sup>4</sup> IM                | -2084.691167 | <b>23.0</b>      | -2085.126185 | <b>18.0</b>      | -2085.203019      | <b>16.9</b>      | -2198.267115       | <b>18.2</b>      | -2198.347821               | <b>18.4</b>      |
| <sup>2</sup> IM                | -2084.690915 | <b>22.6</b>      | -2085.126141 | <b>18.1</b>      | -2085.202038      | <b>17.5</b>      | -2198.265237       | <b>19.4</b>      | -2198.346139               | <b>19.4</b>      |
| <sup>4</sup> TS <sub>reb</sub> | -2084.677510 | <b>29.4</b>      | -2085.119608 | <b>22.2</b>      | -2085.196359      | <b>21.1</b>      | -2198.260862       | <b>22.1</b>      | -2198.342674               | <b>21.6</b>      |
| <sup>2</sup> TS <sub>reb</sub> | -2084.682733 | <b>28.1</b>      | -2085.118700 | <b>22.7</b>      | -2085.196484      | <b>21.0</b>      | -2198.257978       | <b>23.9</b>      | -2198.339900               | <b>23.3</b>      |
| <sup>4</sup> PC                | -2084.783049 | <b>-37.6</b>     | -2085.218945 | <b>-40.2</b>     | -2085.301391      | <b>-44.8</b>     | -2198.365728       | <b>-43.7</b>     | -2198.452354               | <b>-47.2</b>     |
| <sup>2</sup> PC                | -2084.783102 | <b>-39.0</b>     | -2085.214529 | <b>-37.4</b>     | -2085.292727      | <b>-39.4</b>     | -2198.353697       | <b>-36.2</b>     | -2198.436508               | <b>-37.3</b>     |

**Table S5.** Calculated free energies with thermal corrections for *N*-(hydroxymethyl)nornicotine decomposition. All relative values are in kcal/mol relative to the reactant RC.

|                                                         | B1<br>(gas-phase) |                  | B2//B1<br>(gas-phase) |                  | B2//B1<br>+ solv. |                                                                               | B1<br>(gas-phase) |                  | B2//B1<br>(gas-phase) |                  | B2//B1<br>+ solv. |                  |
|---------------------------------------------------------|-------------------|------------------|-----------------------|------------------|-------------------|-------------------------------------------------------------------------------|-------------------|------------------|-----------------------|------------------|-------------------|------------------|
|                                                         | G (a.u.)          | G <sub>rel</sub> | G (a.u.)              | G <sub>rel</sub> | G (a.u.)          | G <sub>rel</sub>                                                              | G (a.u.)          | G <sub>rel</sub> | G (a.u.)              | G <sub>rel</sub> | G (a.u.)          | G <sub>rel</sub> |
| <b>protonated <i>N</i>-(hydroxymethyl)nornicotine</b>   |                   |                  |                       |                  |                   | <b>protonated <i>N</i>-(hydroxymethyl)nornicotine (with water assisted)</b>   |                   |                  |                       |                  |                   |                  |
| RC                                                      | -574.367423       | <b>0.0</b>       | -574.498761           | <b>0.0</b>       | -574.612859       | <b>0.0</b>                                                                    | -650.785681       | <b>0.0</b>       | -650.948702           | <b>0.0</b>       | -651.062501       | <b>0.0</b>       |
| TS                                                      | -574.297676       | <b>43.8</b>      | -574.429447           | <b>43.5</b>      | -574.542961       | <b>43.9</b>                                                                   | -650.729326       | <b>35.4</b>      | -650.891369           | <b>36.0</b>      | -651.003020       | <b>37.3</b>      |
| PC                                                      | -574.379006       | <b>-7.3</b>      | -574.513572           | <b>-9.3</b>      | -574.619829       | <b>-4.4</b>                                                                   | -650.791348       | <b>-3.6</b>      | -650.957443           | <b>-5.5</b>      | -651.059831       | <b>1.7</b>       |
| <b>deprotonated <i>N</i>-(hydroxymethyl)nornicotine</b> |                   |                  |                       |                  |                   | <b>deprotonated <i>N</i>-(hydroxymethyl)nornicotine (with water assisted)</b> |                   |                  |                       |                  |                   |                  |
| RC                                                      | -574.00319        | <b>0.0</b>       | -574.142823           | <b>0.0</b>       | -574.166371       | <b>0.0</b>                                                                    | -650.408680       | <b>0.0</b>       | -650.576905           | <b>0.0</b>       | -650.608029       | <b>0.0</b>       |
| TS                                                      | -573.940292       | <b>39.5</b>      | -574.078349           | <b>40.5</b>      | -574.118557       | <b>30.0</b>                                                                   | -650.377579       | <b>19.5</b>      | -650.546789           | <b>18.9</b>      | -650.591202       | <b>10.6</b>      |
| PC                                                      | -573.991135       | <b>7.6</b>       | -574.132203           | <b>6.7</b>       | -574.157785       | <b>5.4</b>                                                                    | -650.396784       | <b>7.5</b>       | -650.568255           | <b>5.4</b>       | -650.598414       | <b>6.0</b>       |

**Table S6.** Mulliken spin densities of key moieties of nicotine hydroxylation by Cpd I. All data were computed at the B1 level.

|                                | 5'-hydroxylation |         |         |         |         |           | N-methylhydroxylaiton |         |         |         |         |           |
|--------------------------------|------------------|---------|---------|---------|---------|-----------|-----------------------|---------|---------|---------|---------|-----------|
|                                | Fe               | O       | SH      | Por     | H       | nic(rest) | Fe                    | O       | SH      | Por     | H       | nic(rest) |
| <sup>4</sup> RC                | 1.2569           | 0.7648  | 0.5732  | 0.3970  | 0.0001  | 0.0087    | 1.2543                | 0.7670  | 0.5772  | 0.3938  | -0.0006 | 0.0084    |
| <sup>2</sup> RC                | 1.3772           | 0.7274  | -0.6248 | -0.4861 | 0.0002  | 0.0079    | 1.3744                | 0.7296  | -0.6285 | -0.4821 | -0.0004 | 0.0070    |
| <sup>4</sup> TS <sub>H</sub>   | 1.2018           | 0.4444  | 0.4724  | 0.3580  | -0.0687 | 0.5920    | 1.1886                | 0.3695  | 0.4604  | 0.3830  | -0.0624 | 0.6609    |
| <sup>2</sup> TS <sub>H</sub>   | 1.0994           | 0.4156  | -0.4821 | -0.5652 | -0.0794 | 0.6117    | 1.1055                | 0.3399  | -0.4968 | -0.5443 | -0.0715 | 0.6673    |
| <sup>4</sup> IM                | 0.9291           | 0.1019  | 0.4290  | 0.5451  | -0.0022 | 0.9971    | 0.9423                | 0.0987  | 0.4261  | 0.5362  | -0.0034 | 1.0000    |
| <sup>2</sup> IM                | 1.0357           | 0.0410  | -0.4655 | -0.6019 | -0.0044 | 0.9951    | 1.0407                | 0.0326  | -0.4702 | -0.5955 | -0.0031 | 0.9954    |
| <sup>4</sup> TS <sub>reb</sub> | 2.0257           | -0.0085 | 0.3019  | -0.0879 | -0.0001 | 0.7689    | 2.0725                | -0.0369 | 0.3291  | -0.0707 | 0.0031  | 0.7029    |
| <sup>2</sup> TS <sub>reb</sub> | 1.1567           | -0.0362 | -0.3188 | -0.6092 | 0.0009  | 0.8066    | 0.8750                | 0.0277  | 0.3634  | 0.5582  | -0.0047 | -0.8196   |
| <sup>4</sup> PC                | 2.4116           | 0.0004  | 0.5316  | 0.0624  | -0.0003 | -0.0056   | 2.4099                | 0.0004  | 0.5287  | 0.0658  | -0.0035 | -0.0014   |
| <sup>2</sup> PC                | 1.1633           | 0.0003  | -0.0432 | -0.1195 | -0.0003 | -0.0007   | 1.1657                | 0.0002  | -0.0422 | -0.1229 | -0.0010 | 0.0001    |

**Table S7.** Imaginary frequencies of all transition states.

| 5'-hydroxylation by Cpd I                                |          |                                |          | N-methylhydroxylation by Cpd I                             |          |                                |          |
|----------------------------------------------------------|----------|--------------------------------|----------|------------------------------------------------------------|----------|--------------------------------|----------|
| <sup>4</sup> TS <sub>H</sub>                             | i1046.46 | <sup>2</sup> TS <sub>H</sub>   | i1192.41 | <sup>4</sup> TS <sub>H</sub>                               | i532.59  | <sup>2</sup> TS <sub>H</sub>   | i678.13  |
| <sup>4</sup> TS <sub>reb</sub>                           | i433.95  | <sup>2</sup> TS <sub>reb</sub> | i302.88  | <sup>4</sup> TS <sub>reb</sub>                             | i498.73  | <sup>2</sup> TS <sub>reb</sub> | i134.49  |
| decomposition of protonated N-(hydroxymethyl)nornicotine |          |                                |          | decomposition of deprotonated N-(hydroxymethyl)nornicotine |          |                                |          |
| without water                                            | i251.73  | with water                     | i149.69  | without water                                              | i1533.37 | with water                     | i1063.27 |



**Table S8.** Cartesian coordinates for 5'-hydroxylation by Cpd I. The geometries were optimized at the B3LYP/B1 level.

| <sup>4</sup> RC |           |           |           | <sup>2</sup> RC |           |           |           |
|-----------------|-----------|-----------|-----------|-----------------|-----------|-----------|-----------|
| 26              | -0.065242 | -0.464374 | -0.517286 | 26              | -0.093769 | -0.504372 | -0.513343 |
| 7               | 0.551861  | -2.094534 | 0.492157  | 7               | 0.540127  | -2.113384 | 0.505448  |
| 7               | 1.792140  | 0.320412  | -0.373484 | 7               | 1.743171  | 0.326470  | -0.337818 |
| 7               | -0.731156 | 1.306063  | -1.224899 | 7               | -0.787719 | 1.257995  | -1.240130 |
| 7               | -1.967837 | -1.117569 | -0.400603 | 7               | -1.981947 | -1.194840 | -0.429612 |
| 6               | -0.207163 | -3.177850 | 0.847426  | 6               | -0.200660 | -3.213352 | 0.850951  |
| 6               | 1.829997  | -2.386115 | 0.888448  | 6               | 1.817074  | -2.373572 | 0.930170  |
| 6               | 2.910154  | -0.298170 | 0.136452  | 6               | 2.865567  | -0.265132 | 0.191274  |
| 6               | 2.221565  | 1.529588  | -0.861537 | 6               | 2.153767  | 1.542141  | -0.827077 |
| 6               | 0.033894  | 2.397201  | -1.590984 | 6               | -0.037875 | 2.358566  | -1.605651 |
| 6               | -2.028482 | 1.621834  | -1.580198 | 6               | -2.082272 | 1.540480  | -1.626515 |
| 6               | -3.088708 | -0.492214 | -0.880232 | 6               | -3.107749 | -0.592610 | -0.929757 |
| 6               | -2.390134 | -2.338812 | 0.064733  | 6               | -2.386953 | -2.424041 | 0.028981  |
| 6               | 0.612977  | -4.181799 | 1.480601  | 6               | 0.629519  | -4.194401 | 1.505956  |
| 6               | 1.880994  | -3.688268 | 1.507744  | 6               | 1.884631  | -3.671055 | 1.557212  |
| 6               | 4.068968  | 0.542423  | -0.036960 | 6               | 4.008986  | 0.599144  | 0.032071  |
| 6               | 3.642351  | 1.675123  | -0.661678 | 6               | 3.567945  | 1.719181  | -0.605306 |
| 6               | -0.803273 | 3.420440  | -2.163038 | 6               | -0.884025 | 3.357511  | -2.207693 |
| 6               | -2.078189 | 2.942999  | -2.153678 | 6               | -2.148908 | 2.853479  | -2.217701 |
| 6               | -4.247321 | -1.335701 | -0.713399 | 6               | -4.251075 | -1.459806 | -0.780173 |
| 6               | -3.812886 | -2.483224 | -0.125287 | 6               | -3.802943 | -2.597879 | -0.184082 |
| 6               | -1.577623 | -3.298964 | 0.649720  | 6               | -1.563547 | -3.366651 | 0.627678  |
| 6               | 2.931381  | -1.552326 | 0.729767  | 6               | 2.902762  | -1.517121 | 0.789443  |
| 6               | 1.407520  | 2.494542  | -1.444893 | 6               | 1.330536  | 2.485730  | -1.431718 |
| 6               | -3.122413 | 0.785490  | -1.430414 | 6               | -3.160123 | 0.680739  | -1.487573 |
| 1               | -2.051153 | -4.215940 | 0.986099  | 1               | -2.022229 | -4.293810 | 0.956578  |
| 1               | 3.885885  | -1.911894 | 1.101530  | 1               | 3.857610  | -1.855266 | 1.179906  |
| 1               | 1.881379  | 3.412407  | -1.778886 | 1               | 1.792032  | 3.410512  | -1.764097 |
| 1               | -4.086421 | 1.161130  | -1.759133 | 1               | -4.126483 | 1.031719  | -1.836109 |
| 1               | 0.248345  | -5.127960 | 1.858835  | 1               | 0.279234  | -5.146926 | 1.881735  |
| 1               | 2.774791  | -4.144508 | 1.913094  | 1               | 2.779967  | -4.104236 | 1.983892  |
| 1               | 5.067726  | 0.292406  | 0.297135  | 1               | 5.007574  | 0.372080  | 0.382626  |
| 1               | 4.218766  | 2.546920  | -0.943488 | 1               | 4.129993  | 2.601646  | -0.882965 |
| 1               | -0.447455 | 4.381067  | -2.512495 | 1               | -0.541331 | 4.321373  | -2.561410 |
| 1               | -2.982302 | 3.431658  | -2.493520 | 1               | -3.056121 | 3.319103  | -2.580892 |
| 1               | -5.254137 | -1.065419 | -1.004286 | 1               | -5.258307 | -1.210721 | -1.088061 |
| 1               | -4.388825 | -3.351544 | 0.167319  | 1               | -4.365598 | -3.477749 | 0.099697  |
| 8               | 0.190775  | -1.140481 | -1.988393 | 8               | 0.201862  | -1.136191 | -1.995885 |
| 16              | -0.398824 | 0.856031  | 1.612726  | 16              | -0.496454 | 0.835034  | 1.601600  |
| 1               | -1.747916 | 0.945857  | 1.587522  | 1               | -1.846445 | 0.893299  | 1.547914  |
| 1               | 2.790651  | -3.346541 | -4.073263 | 1               | 2.844207  | -3.291018 | -4.063336 |
| 6               | 2.440875  | -2.332393 | -3.868432 | 6               | 2.482066  | -2.282070 | -3.854397 |
| 6               | 3.517514  | -1.238358 | -3.961155 | 6               | 3.549948  | -1.177256 | -3.920434 |

|   |           |           |           |   |           |           |           |
|---|-----------|-----------|-----------|---|-----------|-----------|-----------|
| 7 | 1.413299  | -1.950175 | -4.914410 | 7 | 1.466085  | -1.900119 | -4.912142 |
| 1 | 1.907026  | -2.299549 | -2.916408 | 1 | 1.934015  | -2.262774 | -2.910114 |
| 6 | 2.831515  | -0.027407 | -4.653935 | 6 | 2.867264  | 0.029764  | -4.622901 |
| 1 | 4.380711  | -1.578833 | -4.540075 | 1 | 4.428948  | -1.506726 | -4.481569 |
| 1 | 3.873104  | -0.986000 | -2.959721 | 1 | 3.880839  | -0.925127 | -2.910482 |
| 6 | 1.348708  | -0.409349 | -4.829199 | 6 | 1.389437  | -0.360561 | -4.818715 |
| 6 | 0.094498  | -2.643157 | -4.759431 | 6 | 0.150243  | -2.603447 | -4.779921 |
| 1 | 2.899525  | 0.884277  | -4.056104 | 1 | 2.922330  | 0.942086  | -4.024782 |
| 1 | 3.294366  | 0.185023  | -5.622010 | 1 | 3.342046  | 0.244260  | -5.584840 |
| 1 | 0.806783  | -0.239775 | -3.894443 | 1 | 0.834475  | -0.200038 | -3.890072 |
| 6 | 0.608440  | 0.190602  | -5.996153 | 6 | 0.661272  | 0.241674  | -5.992176 |
| 1 | 0.257543  | -3.720240 | -4.832045 | 1 | 0.322109  | -3.678848 | -4.857007 |
| 1 | -0.304805 | -2.375420 | -3.779591 | 1 | -0.264473 | -2.344779 | -3.804002 |
| 1 | -0.569858 | -2.309739 | -5.557782 | 1 | -0.505209 | -2.269641 | -5.585457 |
| 6 | -0.593326 | 0.883727  | -5.802055 | 6 | -0.541642 | 0.935843  | -5.809647 |
| 6 | 1.088918  | 0.087834  | -7.310623 | 6 | 1.155899  | 0.141160  | -7.301554 |
| 6 | -1.242999 | 1.431895  | -6.905762 | 6 | -1.178635 | 1.486802  | -6.919394 |
| 1 | -1.004502 | 0.998700  | -4.801964 | 1 | -0.963345 | 1.050375  | -4.813925 |
| 7 | 0.469378  | 0.592760  | -8.378200 | 7 | 0.548592  | 0.648674  | -8.374876 |
| 1 | 2.029740  | -0.424972 | -7.521778 | 1 | 2.098612  | -0.372026 | -7.503422 |
| 6 | -0.675864 | 1.255625  | -8.170077 | 6 | -0.598212 | 1.312278  | -8.177879 |
| 1 | -2.171617 | 1.982140  | -6.792650 | 1 | -2.107761 | 2.037961  | -6.815202 |
| 1 | -1.158141 | 1.664313  | -9.055302 | 1 | -1.070528 | 1.723074  | -9.067487 |
| 1 | 1.788157  | -2.184704 | -5.839836 | 1 | 1.855241  | -2.126394 | -5.833693 |

${}^4\text{TS}_H$

|    |           |           |           |
|----|-----------|-----------|-----------|
| 26 | -0.084821 | -0.293974 | -0.345108 |
| 7  | 0.294858  | -2.261763 | -0.117456 |
| 7  | 1.913463  | 0.084227  | -0.111278 |
| 7  | -0.446454 | 1.677522  | -0.355728 |
| 7  | -2.040088 | -0.669326 | -0.509784 |
| 6  | -0.625798 | -3.278420 | -0.174013 |
| 6  | 1.516653  | -2.866126 | 0.079025  |
| 6  | 2.919280  | -0.834801 | 0.093901  |
| 6  | 2.522374  | 1.317187  | -0.106484 |
| 6  | 0.480799  | 2.692859  | -0.341227 |
| 6  | -1.670470 | 2.285897  | -0.474461 |
| 6  | -3.053547 | 0.248477  | -0.610350 |
| 6  | -2.644291 | -1.899912 | -0.531460 |
| 6  | 0.026117  | -4.551815 | -0.001483 |
| 6  | 1.355014  | -4.295788 | 0.156074  |
| 6  | 4.189699  | -0.163122 | 0.212343  |
| 6  | 3.944314  | 1.170968  | 0.085074  |
| 6  | -0.180037 | 3.971165  | -0.436876 |
| 6  | -1.515691 | 3.718545  | -0.513766 |
| 6  | -4.329175 | -0.420673 | -0.725963 |

${}^2\text{TS}_H$

|    |           |           |           |
|----|-----------|-----------|-----------|
| 26 | 0.007656  | -0.237047 | -0.334619 |
| 7  | 0.520887  | -2.172705 | -0.193746 |
| 7  | 1.943914  | 0.264789  | -0.066046 |
| 7  | -0.518886 | 1.721575  | -0.304431 |
| 7  | -1.944336 | -0.725458 | -0.468065 |
| 6  | -0.331233 | -3.243822 | -0.293112 |
| 6  | 1.763755  | -2.703641 | 0.042187  |
| 6  | 3.011541  | -0.575355 | 0.166398  |
| 6  | 2.461786  | 1.537111  | -0.061258 |
| 6  | 0.341636  | 2.795534  | -0.285082 |
| 6  | -1.783651 | 2.254616  | -0.419534 |
| 6  | -3.016281 | 0.118314  | -0.570096 |
| 6  | -2.456768 | -1.994831 | -0.547764 |
| 6  | 0.396570  | -4.479795 | -0.144519 |
| 6  | 1.700157  | -4.143152 | 0.070545  |
| 6  | 4.226652  | 0.186626  | 0.310280  |
| 6  | 3.887539  | 1.496750  | 0.157667  |
| 6  | -0.401968 | 4.031353  | -0.364001 |
| 6  | -1.717560 | 3.696769  | -0.440102 |
| 6  | -4.240439 | -0.633991 | -0.715944 |

|    |           |           |           |    |           |           |           |
|----|-----------|-----------|-----------|----|-----------|-----------|-----------|
| 6  | -4.074883 | -1.754776 | -0.680293 | 6  | -3.892092 | -1.949418 | -0.703948 |
| 6  | -1.992333 | -3.115241 | -0.377101 | 6  | -1.710677 | -3.164396 | -0.469985 |
| 6  | 2.737809  | -2.208949 | 0.171472  | 6  | 2.928002  | -1.959871 | 0.228020  |
| 6  | 1.858236  | 2.531621  | -0.236461 | 6  | 1.723188  | 2.710013  | -0.197878 |
| 6  | -2.889111 | 1.625914  | -0.582115 | 6  | -2.947025 | 1.510677  | -0.537826 |
| 1  | -2.601575 | -4.013523 | -0.395882 | 1  | -2.254471 | -4.102636 | -0.527581 |
| 1  | 3.619443  | -2.820404 | 0.337736  | 1  | 3.843320  | -2.507781 | 0.430905  |
| 1  | 2.462392  | 3.433606  | -0.220625 | 1  | 2.276226  | 3.644355  | -0.185483 |
| 1  | -3.781691 | 2.238243  | -0.662942 | 1  | -3.881322 | 2.056727  | -0.625360 |
| 1  | -0.480787 | -5.508108 | 0.004344  | 1  | -0.047027 | -5.466674 | -0.176258 |
| 1  | 2.161270  | -4.999359 | 0.319058  | 1  | 2.544245  | -4.797041 | 0.248385  |
| 1  | 5.135642  | -0.658966 | 0.388718  | 1  | 5.202285  | -0.237101 | 0.510763  |
| 1  | 4.647954  | 1.991966  | 0.135682  | 1  | 4.528080  | 2.367639  | 0.210980  |
| 1  | 0.325813  | 4.928073  | -0.437270 | 1  | 0.041375  | 5.018639  | -0.354442 |
| 1  | -2.331743 | 4.424840  | -0.594077 | 1  | -2.576013 | 4.352207  | -0.509419 |
| 1  | -5.283010 | 0.082466  | -0.816986 | 1  | -5.226824 | -0.198229 | -0.807933 |
| 1  | -4.776622 | -2.577614 | -0.723449 | 1  | -4.533831 | -2.817539 | -0.781530 |
| 8  | 0.069626  | -0.350038 | -2.098074 | 8  | 0.095283  | -0.166960 | -2.110786 |
| 16 | -0.090962 | -0.313359 | 2.028300  | 16 | -0.133866 | 0.094661  | 2.043744  |
| 1  | 0.143072  | 1.001435  | 2.238935  | 1  | -1.448942 | 0.393710  | 2.136835  |
| 1  | 3.098782  | -0.858755 | -2.813611 | 1  | 2.751809  | -1.630560 | -2.721508 |
| 6  | 2.304718  | -0.360862 | -3.365445 | 6  | 2.203683  | -0.905168 | -3.318454 |
| 6  | 2.462042  | 1.048859  | -3.890131 | 6  | 2.848284  | 0.363760  | -3.830838 |
| 7  | 1.774170  | -1.195196 | -4.488208 | 7  | 1.474773  | -1.528762 | -4.464006 |
| 1  | 1.093299  | -0.317813 | -2.443272 | 1  | 1.080396  | -0.455451 | -2.465873 |
| 6  | 1.684249  | 1.075791  | -5.232897 | 6  | 2.173166  | 0.638927  | -5.201365 |
| 1  | 3.516707  | 1.317179  | -4.034068 | 1  | 3.935453  | 0.255097  | -3.934962 |
| 1  | 2.054974  | 1.765866  | -3.167610 | 1  | 2.682156  | 1.181053  | -3.120713 |
| 6  | 0.855173  | -0.220925 | -5.261050 | 6  | 0.964041  | -0.312734 | -5.271731 |
| 6  | 1.121841  | -2.479414 | -4.067521 | 6  | 0.416642  | -2.519312 | -4.073685 |
| 1  | 1.024069  | 1.941177  | -5.324251 | 1  | 1.838028  | 1.672870  | -5.309107 |
| 1  | 2.373221  | 1.106352  | -6.082900 | 1  | 2.865006  | 0.437993  | -6.025244 |
| 1  | -0.011434 | -0.121162 | -4.601621 | 1  | 0.150611  | 0.072804  | -4.650544 |
| 6  | 0.449776  | -0.766615 | -6.604799 | 6  | 0.460473  | -0.705961 | -6.635318 |
| 1  | 1.865372  | -3.089759 | -3.551881 | 1  | 0.895373  | -3.339412 | -3.535576 |
| 1  | 0.307604  | -2.227436 | -3.388385 | 1  | -0.286384 | -2.003219 | -3.419912 |
| 1  | 0.762565  | -2.993066 | -4.960224 | 1  | -0.061995 | -2.887390 | -4.982072 |
| 6  | -0.888403 | -1.076419 | -6.879107 | 6  | -0.889451 | -0.549886 | -6.974555 |
| 6  | 1.384484  | -0.983749 | -7.628938 | 6  | 1.314490  | -1.234701 | -7.615550 |
| 6  | -1.225548 | -1.573177 | -8.135768 | 6  | -1.314616 | -0.915562 | -8.249428 |
| 1  | -1.653080 | -0.921888 | -6.121412 | 1  | -1.592283 | -0.139644 | -6.253134 |
| 7  | 1.079349  | -1.474791 | -8.830664 | 7  | 0.918791  | -1.605146 | -8.833819 |
| 1  | 2.439738  | -0.746255 | -7.480796 | 1  | 2.380076  | -1.364883 | -7.416122 |
| 6  | -0.206957 | -1.758372 | -9.073784 | 6  | -0.374941 | -1.440925 | -9.139743 |
| 1  | -2.253549 | -1.815586 | -8.385061 | 1  | -2.351294 | -0.799984 | -8.548756 |
| 1  | -0.430495 | -2.149667 | -10.06373 | 1  | -0.670247 | -1.742608 | -10.14215 |

|                 |    |           |           | 5         |                 |           |           |           | 2 |
|-----------------|----|-----------|-----------|-----------|-----------------|-----------|-----------|-----------|---|
|                 | 1  | 2.542294  | -1.441097 | -5.128343 | 1               | 2.145796  | -2.021497 | -5.069500 |   |
| <sup>4</sup> IM |    |           |           |           | <sup>2</sup> IM |           |           |           |   |
|                 | 26 | 0.122095  | -0.222965 | -0.314472 | 26              | 0.100332  | -0.258698 | -0.303285 |   |
|                 | 7  | 0.469980  | -1.963762 | 0.645521  | 7               | 0.448945  | -1.979841 | 0.662821  |   |
|                 | 7  | 1.783571  | 0.537823  | 0.539323  | 7               | 1.779308  | 0.511293  | 0.530975  |   |
|                 | 7  | -0.290625 | 1.560296  | -1.151508 | 7               | -0.308734 | 1.533023  | -1.165608 |   |
|                 | 7  | -1.601891 | -0.948431 | -1.087791 | 7               | -1.620882 | -0.976934 | -1.062331 |   |
|                 | 6  | -0.280783 | -3.105165 | 0.536025  | 6               | -0.308430 | -3.119621 | 0.575850  |   |
|                 | 6  | 1.473125  | -2.258305 | 1.523783  | 6               | 1.465544  | -2.271542 | 1.532851  |   |
|                 | 6  | 2.620679  | -0.068546 | 1.451879  | 6               | 2.626779  | -0.091148 | 1.430869  |   |
|                 | 6  | 2.303444  | 1.790987  | 0.334825  | 6               | 2.298791  | 1.762665  | 0.307609  |   |
|                 | 6  | 0.517260  | 2.674222  | -1.135552 | 6               | 0.507386  | 2.639909  | -1.164016 |   |
|                 | 6  | -1.398334 | 1.909988  | -1.899816 | 6               | -1.408099 | 1.874591  | -1.922623 |   |
|                 | 6  | -2.538249 | -0.284653 | -1.829729 | 6               | -2.553952 | -0.315533 | -1.816586 |   |
|                 | 6  | -2.067615 | -2.229287 | -0.950741 | 6               | -2.096799 | -2.252687 | -0.908435 |   |
|                 | 6  | 0.277546  | -4.153916 | 1.356441  | 6               | 0.254744  | -4.161532 | 1.401428  |   |
|                 | 6  | 1.367629  | -3.623510 | 1.977996  | 6               | 1.355619  | -3.631402 | 2.002097  |   |
|                 | 6  | 3.690926  | 0.826096  | 1.823547  | 6               | 3.706137  | 0.801035  | 1.780933  |   |
|                 | 6  | 3.501204  | 1.975317  | 1.121718  | 6               | 3.508581  | 1.947458  | 1.075598  |   |
|                 | 6  | -0.094586 | 3.746594  | -1.884234 | 6               | -0.095936 | 3.704707  | -1.931131 |   |
|                 | 6  | -1.285260 | 3.276967  | -2.348412 | 6               | -1.287601 | 3.233957  | -2.393246 |   |
|                 | 6  | -3.626543 | -1.166880 | -2.179351 | 6               | -3.647159 | -1.196945 | -2.153055 |   |
|                 | 6  | -3.327934 | -2.382596 | -1.637277 | 6               | -3.357915 | -2.405997 | -1.593109 |   |
|                 | 6  | -1.447667 | -3.234414 | -0.211019 | 6               | -1.480831 | -3.253219 | -0.160677 |   |
|                 | 6  | 2.472548  | -1.365568 | 1.919622  | 6               | 2.475373  | -1.386397 | 1.908876  |   |
|                 | 6  | 1.735529  | 2.770696  | -0.473797 | 6               | 1.728116  | 2.736747  | -0.505345 |   |
|                 | 6  | -2.447499 | 1.057654  | -2.207457 | 6               | -2.460495 | 1.018312  | -2.215968 |   |
|                 | 1  | -1.942436 | -4.200910 | -0.183994 | 1               | -1.979862 | -4.216904 | -0.120446 |   |
|                 | 1  | 3.204112  | -1.723823 | 2.637422  | 1               | 3.213267  | -1.746132 | 2.619360  |   |
|                 | 1  | 2.262141  | 3.717664  | -0.545372 | 1               | 2.259737  | 3.679855  | -0.590260 |   |
|                 | 1  | -3.262338 | 1.464937  | -2.798881 | 1               | -3.275289 | 1.416800  | -2.813391 |   |
|                 | 1  | -0.129674 | -5.152592 | 1.447424  | 1               | -0.157320 | -5.156578 | 1.508733  |   |
|                 | 1  | 2.041118  | -4.097580 | 2.680000  | 1               | 2.035368  | -4.102070 | 2.700367  |   |
|                 | 1  | 4.475278  | 0.590171  | 2.530916  | 1               | 4.501072  | 0.566512  | 2.476865  |   |
|                 | 1  | 4.094915  | 2.880086  | 1.139232  | 1               | 4.105943  | 2.850018  | 1.078381  |   |
|                 | 1  | 0.333998  | 4.732453  | -2.011178 | 1               | 0.338222  | 4.686318  | -2.071633 |   |
|                 | 1  | -2.030576 | 3.798119  | -2.935601 | 1               | -2.028145 | 3.749820  | -2.991085 |   |
|                 | 1  | -4.504018 | -0.877673 | -2.743863 | 1               | -4.522043 | -0.910197 | -2.722841 |   |
|                 | 1  | -3.909133 | -3.295232 | -1.669933 | 1               | -3.944961 | -3.315214 | -1.613506 |   |
|                 | 8  | 1.059603  | -0.810131 | -1.800109 | 8               | 1.054715  | -0.792205 | -1.796902 |   |
|                 | 16 | -1.000935 | 0.706387  | 1.584081  | 16              | -0.972400 | 0.761073  | 1.571074  |   |
|                 | 1  | -2.189246 | 1.000663  | 1.010252  | 1               | -2.161271 | 1.064291  | 1.002918  |   |
|                 | 1  | 3.560882  | -1.298437 | -4.234966 | 1               | 3.566844  | -1.256381 | -4.202597 |   |
|                 | 6  | 2.719511  | -0.694688 | -4.548976 | 6               | 2.726202  | -0.655343 | -4.523388 |   |

|   |           |           |           |   |           |           |           |
|---|-----------|-----------|-----------|---|-----------|-----------|-----------|
| 6 | 2.428853  | 0.737675  | -4.286803 | 6 | 2.434672  | 0.780029  | -4.278127 |
| 7 | 1.522621  | -1.401619 | -5.027103 | 7 | 1.537263  | -1.364388 | -5.017250 |
| 1 | 1.922915  | -1.073938 | -1.438303 | 1 | 1.924430  | -1.037772 | -1.437592 |
| 6 | 1.115267  | 0.985757  | -5.056136 | 6 | 1.123643  | 1.020488  | -5.054638 |
| 1 | 3.246857  | 1.393857  | -4.605373 | 1 | 3.253663  | 1.432426  | -4.602282 |
| 1 | 2.271062  | 0.885932  | -3.207702 | 1 | 2.275383  | 0.942242  | -3.201533 |
| 6 | 0.364001  | -0.352144 | -4.970072 | 6 | 0.375319  | -0.318866 | -4.965993 |
| 6 | 1.202637  | -2.676011 | -4.286654 | 6 | 1.215740  | -2.644642 | -4.288212 |
| 1 | 0.512775  | 1.780704  | -4.610069 | 1 | 0.517221  | 1.816123  | -4.615294 |
| 1 | 1.317098  | 1.260598  | -6.096280 | 1 | 1.329577  | 1.290615  | -6.095244 |
| 1 | -0.031967 | -0.475240 | -3.959940 | 1 | -0.022655 | -0.440429 | -3.956448 |
| 6 | -0.672127 | -0.662843 | -6.019213 | 6 | -0.657851 | -0.634976 | -6.016373 |
| 1 | 2.047722  | -3.359283 | -4.391978 | 1 | 2.064004  | -3.324288 | -4.391449 |
| 1 | 1.029918  | -2.398232 | -3.242871 | 1 | 1.034382  | -2.375065 | -3.243865 |
| 1 | 0.310543  | -3.112924 | -4.739534 | 1 | 0.328743  | -3.081565 | -4.750884 |
| 6 | -1.932454 | -1.161592 | -5.663866 | 6 | -1.917956 | -1.134803 | -5.661712 |
| 6 | -0.409737 | -0.488425 | -7.387750 | 6 | -0.393408 | -0.464241 | -7.384933 |
| 6 | -2.852409 | -1.452333 | -6.668655 | 6 | -2.835581 | -1.430472 | -6.667145 |
| 1 | -2.191018 | -1.311192 | -4.618397 | 1 | -2.177797 | -1.281259 | -4.616153 |
| 7 | -1.276824 | -0.775400 | -8.360164 | 7 | -1.258196 | -0.755952 | -8.357993 |
| 1 | 0.548981  | -0.091140 | -7.725061 | 1 | 0.565062  | -0.066065 | -7.721897 |
| 6 | -2.477281 | -1.246042 | -7.998362 | 6 | -2.458370 | -1.227766 | -7.996838 |
| 1 | -3.839663 | -1.834884 | -6.429755 | 1 | -3.822554 | -1.814093 | -6.428828 |
| 1 | -3.167757 | -1.466672 | -8.809456 | 1 | -3.146961 | -1.452247 | -8.808468 |
| 1 | 1.647542  | -1.649010 | -6.018289 | 1 | 1.672632  | -1.605243 | -6.008796 |

${}^4\text{TS}_{\text{reb}}$

|    |           |           |           |
|----|-----------|-----------|-----------|
| 26 | -0.099081 | -0.007611 | -0.399002 |
| 7  | -0.312429 | -1.834919 | -1.241229 |
| 7  | 1.814686  | -0.418150 | 0.022133  |
| 7  | 0.153458  | 1.878344  | 0.293218  |
| 7  | -2.043154 | 0.378206  | -0.737642 |
| 6  | -1.476900 | -2.385598 | -1.724247 |
| 6  | 0.625031  | -2.840114 | -1.261083 |
| 6  | 2.472403  | -1.608743 | -0.200203 |
| 6  | 2.733731  | 0.424288  | 0.607213  |
| 6  | 1.293709  | 2.401377  | 0.861779  |
| 6  | -0.825181 | 2.835479  | 0.450060  |
| 6  | -2.710327 | 1.552491  | -0.474950 |
| 6  | -2.959998 | -0.460054 | -1.330655 |
| 6  | -1.253287 | -3.757966 | -2.104041 |
| 6  | 0.048051  | -4.041747 | -1.811208 |
| 6  | 3.832143  | -1.511639 | 0.261999  |
| 6  | 3.994270  | -0.253421 | 0.759367  |
| 6  | 1.037563  | 3.736009  | 1.341417  |
| 6  | -0.272764 | 4.004017  | 1.087841  |

${}^2\text{TS}_{\text{reb}}$

|    |           |           |           |
|----|-----------|-----------|-----------|
| 26 | 0.106491  | -0.145886 | -0.426385 |
| 7  | 0.218598  | -2.085264 | -0.978141 |
| 7  | 1.910412  | -0.266492 | 0.479301  |
| 7  | -0.021222 | 1.768164  | 0.185612  |
| 7  | -1.708251 | -0.043059 | -1.289300 |
| 6  | -0.749840 | -2.847950 | -1.585718 |
| 6  | 1.275958  | -2.932616 | -0.750773 |
| 6  | 2.738755  | -1.364249 | 0.491467  |
| 6  | 2.567267  | 0.704765  | 1.203773  |
| 6  | 0.874101  | 2.484546  | 0.938598  |
| 6  | -1.051059 | 2.632558  | -0.090526 |
| 6  | -2.507695 | 1.066171  | -1.351329 |
| 6  | -2.428158 | -1.055576 | -1.870572 |
| 6  | -0.290446 | -4.206647 | -1.749953 |
| 6  | 0.972693  | -4.255512 | -1.242143 |
| 6  | 3.942039  | -1.075664 | 1.236315  |
| 6  | 3.832853  | 0.204456  | 1.683321  |
| 6  | 0.399228  | 3.831496  | 1.145080  |
| 6  | -0.796221 | 3.925010  | 0.500934  |

|    |           |           |           |    |           |           |           |
|----|-----------|-----------|-----------|----|-----------|-----------|-----------|
| 6  | -4.085165 | 1.440947  | -0.889136 | 6  | -3.753699 | 0.756080  | -2.013613 |
| 6  | -4.239553 | 0.195584  | -1.420341 | 6  | -3.707260 | -0.568255 | -2.329889 |
| 6  | -2.706416 | -1.744715 | -1.791905 | 6  | -1.989431 | -2.370394 | -1.998731 |
| 6  | 1.928078  | -2.737967 | -0.794208 | 6  | 2.456593  | -2.589818 | -0.099497 |
| 6  | 2.502798  | 1.736889  | 0.994701  | 6  | 2.082441  | 1.987237  | 1.423599  |
| 6  | -2.154306 | 2.696066  | 0.083614  | 6  | -2.194534 | 2.314602  | -0.815502 |
| 1  | -3.541199 | -2.301624 | -2.205423 | 1  | -2.669978 | -3.080370 | -2.459450 |
| 1  | 2.562536  | -3.614475 | -0.876863 | 1  | 3.206762  | -3.368471 | 0.001332  |
| 1  | 3.323106  | 2.273708  | 1.459453  | 1  | 2.697936  | 2.660094  | 2.012810  |
| 1  | -2.813375 | 3.540822  | 0.254643  | 1  | -2.931398 | 3.102482  | -0.941126 |
| 1  | -2.011602 | -4.416386 | -2.508176 | 1  | -0.875253 | -5.010814 | -2.178375 |
| 1  | 0.572171  | -4.983291 | -1.917917 | 1  | 1.637706  | -5.106852 | -1.173920 |
| 1  | 4.558203  | -2.312623 | 0.208691  | 1  | 4.749829  | -1.777545 | 1.398515  |
| 1  | 4.879975  | 0.188601  | 1.197032  | 1  | 4.533380  | 0.770624  | 2.283335  |
| 1  | 1.772850  | 4.366625  | 1.824109  | 1  | 0.921129  | 4.591674  | 1.711680  |
| 1  | -0.833796 | 4.900213  | 1.319120  | 1  | -1.459515 | 4.777610  | 0.432986  |
| 1  | -4.824406 | 2.224445  | -0.783739 | 1  | -4.557859 | 1.460798  | -2.182159 |
| 1  | -5.132224 | -0.252230 | -1.837829 | 1  | -4.464755 | -1.172644 | -2.812243 |
| 8  | 0.351704  | 0.703334  | -2.148250 | 8  | 0.999809  | 0.427976  | -2.022731 |
| 16 | -0.571613 | -0.828687 | 1.705571  | 16 | -0.772952 | -0.998557 | 1.582918  |
| 1  | -1.911351 | -0.653975 | 1.686840  | 1  | -0.203644 | -0.125343 | 2.443821  |
| 1  | 0.790750  | 2.262866  | -4.228514 | 1  | 2.060558  | 1.991876  | -3.988779 |
| 6  | 0.332120  | 1.283643  | -4.295206 | 6  | 1.188204  | 1.371517  | -4.150864 |
| 6  | -1.089577 | 1.004381  | -4.664157 | 6  | -0.213095 | 1.829903  | -4.362211 |
| 7  | 1.206999  | 0.223068  | -4.829368 | 7  | 1.422670  | 0.105164  | -4.859844 |
| 1  | 0.561103  | 1.619743  | -1.892295 | 1  | 1.672959  | 1.039010  | -1.679236 |
| 6  | -1.055041 | -0.380873 | -5.356687 | 6  | -0.910871 | 0.646742  | -5.083337 |
| 1  | -1.506113 | 1.777261  | -5.322885 | 1  | -0.262285 | 2.751642  | -4.958519 |
| 1  | -1.702667 | 0.986458  | -3.756496 | 1  | -0.677038 | 2.049836  | -3.393553 |
| 6  | 0.284622  | -1.017047 | -4.946556 | 6  | 0.023052  | -0.565335 | -4.907228 |
| 6  | 2.484334  | -0.011461 | -4.071497 | 6  | 2.513735  | -0.757626 | -4.291661 |
| 1  | -1.880290 | -1.025478 | -5.046943 | 1  | -1.891673 | 0.420128  | -4.659860 |
| 1  | -1.111043 | -0.278037 | -6.444967 | 1  | -1.057672 | 0.870108  | -6.144184 |
| 1  | 0.224670  | -1.389429 | -3.921747 | 1  | -0.089214 | -0.978785 | -3.903677 |
| 6  | 0.872655  | -2.050601 | -5.873089 | 6  | -0.021523 | -1.649402 | -5.953607 |
| 1  | 3.088299  | 0.896235  | -4.130978 | 1  | 3.459918  | -0.221105 | -4.388380 |
| 1  | 2.214584  | -0.219665 | -3.038132 | 1  | 2.268075  | -0.921295 | -3.243024 |
| 1  | 3.009848  | -0.842980 | -4.542987 | 1  | 2.549232  | -1.685202 | -4.864519 |
| 6  | 1.231590  | -3.320707 | -5.405035 | 6  | -0.091702 | -3.000359 | -5.588132 |
| 6  | 1.079028  | -1.783565 | -7.235719 | 6  | 0.023391  | -1.355566 | -7.325803 |
| 6  | 1.766013  | -4.244988 | -6.299889 | 6  | -0.118808 | -3.971950 | -6.585858 |
| 1  | 1.078466  | -3.580801 | -4.360653 | 1  | -0.128298 | -3.283174 | -4.538739 |
| 7  | 1.606064  | -2.651953 | -8.099447 | 7  | 0.013382  | -2.276120 | -8.291110 |
| 1  | 0.800466  | -0.818460 | -7.664790 | 1  | 0.065630  | -0.322303 | -7.674475 |
| 6  | 1.938539  | -3.862514 | -7.632183 | 6  | -0.060726 | -3.560647 | -7.919568 |
| 1  | 2.047279  | -5.241361 | -5.974161 | 1  | -0.179138 | -5.027063 | -6.338711 |

---

|   |          |           |           |   |           |           |           |
|---|----------|-----------|-----------|---|-----------|-----------|-----------|
| 1 | 2.359152 | -4.555173 | -8.357719 | 1 | -0.074390 | -4.290821 | -8.725711 |
| 1 | 1.478935 | 0.463532  | -5.794120 | 1 | 1.676548  | 0.300043  | -5.840428 |

<sup>4</sup>PC

|    |           |           |           |
|----|-----------|-----------|-----------|
| 26 | -0.364570 | -0.271932 | 0.082270  |
| 7  | -0.377395 | -2.275663 | -0.127726 |
| 7  | 1.657609  | -0.312159 | 0.016607  |
| 7  | -0.275493 | 1.722921  | -0.325938 |
| 7  | -2.311876 | -0.240657 | -0.418508 |
| 6  | -1.485675 | -3.090816 | -0.225354 |
| 6  | 0.691662  | -3.129710 | 0.059364  |
| 6  | 2.459298  | -1.425861 | 0.180024  |
| 6  | 2.513824  | 0.770381  | 0.093613  |
| 6  | 0.830563  | 2.546147  | -0.155505 |
| 6  | -1.362525 | 2.585931  | -0.391442 |
| 6  | -3.117431 | 0.874147  | -0.543741 |
| 6  | -3.166871 | -1.321429 | -0.497337 |
| 6  | -1.104271 | -4.474092 | -0.109813 |
| 6  | 0.245610  | -4.498090 | 0.068487  |
| 6  | 3.834392  | -1.036303 | 0.333162  |
| 6  | 3.868589  | 0.325612  | 0.279603  |
| 6  | 0.432716  | 3.924362  | -0.164137 |
| 6  | -0.923636 | 3.948697  | -0.309622 |
| 6  | -4.492345 | 0.484163  | -0.708842 |
| 6  | -4.522915 | -0.877083 | -0.682401 |
| 6  | -2.788905 | -2.652065 | -0.403808 |
| 6  | 2.014424  | -2.739651 | 0.199295  |
| 6  | 2.132971  | 2.103804  | 0.015161  |
| 6  | -2.684057 | 2.191105  | -0.517424 |
| 1  | -3.569698 | -3.402999 | -0.466734 |
| 1  | 2.755551  | -3.518812 | 0.345366  |
| 1  | 2.908588  | 2.854941  | 0.124895  |
| 1  | -3.436531 | 2.969413  | -0.589590 |
| 1  | -1.792844 | -5.308058 | -0.153470 |
| 1  | 0.892617  | -5.355631 | 0.200529  |
| 1  | 4.657142  | -1.724641 | 0.477548  |
| 1  | 4.725085  | 0.981065  | 0.372004  |
| 1  | 1.110658  | 4.761054  | -0.054772 |
| 1  | -1.579199 | 4.808977  | -0.347014 |
| 1  | -5.317397 | 1.174492  | -0.827204 |
| 1  | -5.378751 | -1.533395 | -0.773262 |
| 8  | 0.011772  | 1.319218  | -3.224824 |
| 16 | -0.556306 | -0.136712 | 2.450051  |
| 1  | -1.718673 | -0.823574 | 2.524888  |
| 1  | 1.891899  | 0.706544  | -2.621398 |
| 6  | 1.282618  | 0.881444  | -3.512621 |

<sup>2</sup>PC

|    |           |           |           |
|----|-----------|-----------|-----------|
| 26 | -0.462577 | -0.367299 | 0.073990  |
| 7  | -0.740180 | -2.338479 | 0.019361  |
| 7  | 1.530085  | -0.638716 | -0.008149 |
| 7  | -0.150693 | 1.593961  | -0.343334 |
| 7  | -2.418062 | -0.110598 | -0.253737 |
| 6  | -1.936764 | -3.024964 | -0.031714 |
| 6  | 0.222479  | -3.304191 | 0.238513  |
| 6  | 2.192795  | -1.830168 | 0.198792  |
| 6  | 2.521902  | 0.320281  | -0.083029 |
| 6  | 1.057261  | 2.284077  | -0.304921 |
| 6  | -1.127834 | 2.580803  | -0.331588 |
| 6  | -3.088532 | 1.093495  | -0.326901 |
| 6  | -3.403606 | -1.074963 | -0.290232 |
| 6  | -1.718642 | -4.438306 | 0.138629  |
| 6  | -0.380222 | -4.610794 | 0.313364  |
| 6  | 3.618049  | -1.619572 | 0.227059  |
| 6  | 3.823077  | -0.285215 | 0.045894  |
| 6  | 0.826651  | 3.700142  | -0.322597 |
| 6  | -0.525684 | 3.883137  | -0.332694 |
| 6  | -4.511354 | 0.877195  | -0.419013 |
| 6  | -4.706231 | -0.468358 | -0.404077 |
| 6  | -3.182709 | -2.439697 | -0.194946 |
| 6  | 1.585050  | -3.070405 | 0.330221  |
| 6  | 2.305683  | 1.684555  | -0.224973 |
| 6  | -2.493714 | 2.345403  | -0.338718 |
| 1  | -4.048033 | -3.094330 | -0.221264 |
| 1  | 2.229080  | -3.927432 | 0.500960  |
| 1  | 3.175246  | 2.334926  | -0.216131 |
| 1  | -3.149222 | 3.210133  | -0.364055 |
| 1  | -2.499847 | -5.187353 | 0.131256  |
| 1  | 0.164594  | -5.531648 | 0.477126  |
| 1  | 4.353812  | -2.399255 | 0.377318  |
| 1  | 4.760836  | 0.255311  | 0.023246  |
| 1  | 1.605026  | 4.452274  | -0.303720 |
| 1  | -1.075931 | 4.815276  | -0.329263 |
| 1  | -5.250283 | 1.664780  | -0.490480 |
| 1  | -5.638203 | -1.016027 | -0.457735 |
| 8  | -0.263636 | 0.929761  | -3.185436 |
| 16 | -0.523697 | -0.131558 | 2.269584  |
| 1  | -1.676835 | -0.800269 | 2.501777  |
| 1  | 1.696663  | 1.576379  | -3.075063 |
| 6  | 0.940420  | 1.219523  | -3.781105 |

---

|   |           |           |           |   |           |           |           |
|---|-----------|-----------|-----------|---|-----------|-----------|-----------|
| 6 | 1.947036  | 1.719032  | -4.600510 | 6 | 0.769716  | 2.068893  | -5.037467 |
| 7 | 1.156882  | -0.489244 | -4.249018 | 7 | 1.489808  | -0.100174 | -4.408176 |
| 1 | -0.136686 | 1.338034  | -2.250250 | 1 | -0.219160 | 1.072793  | -2.208756 |
| 6 | 1.269361  | 1.285998  | -5.921344 | 6 | 0.222184  | 1.099740  | -6.111874 |
| 1 | 3.023202  | 1.510384  | -4.622681 | 1 | 1.737142  | 2.487446  | -5.339132 |
| 1 | 1.817228  | 2.780169  | -4.380220 | 1 | 0.096389  | 2.902368  | -4.829364 |
| 6 | 0.676479  | -0.130795 | -5.671923 | 6 | 0.603203  | -0.336061 | -5.650015 |
| 6 | 0.319345  | -1.508439 | -3.551734 | 6 | 1.582292  | -1.264833 | -3.479181 |
| 1 | 0.457094  | 1.966129  | -6.186203 | 1 | -0.865097 | 1.168882  | -6.185348 |
| 1 | 1.975363  | 1.279600  | -6.753683 | 1 | 0.631718  | 1.320084  | -7.099326 |
| 1 | -0.409002 | -0.067807 | -5.573969 | 1 | -0.275864 | -0.844736 | -5.249593 |
| 6 | 1.043990  | -1.217844 | -6.651277 | 6 | 1.304621  | -1.222806 | -6.648657 |
| 1 | 0.772316  | -1.745796 | -2.588498 | 1 | 2.302950  | -1.037862 | -2.692602 |
| 1 | -0.672357 | -1.085309 | -3.397142 | 1 | 0.599483  | -1.433670 | -3.041731 |
| 1 | 0.265620  | -2.400710 | -4.177565 | 1 | 1.906078  | -2.136179 | -4.050540 |
| 6 | 0.064377  | -2.011750 | -7.259853 | 6 | 0.842342  | -2.515216 | -6.925160 |
| 6 | 2.382650  | -1.475005 | -6.986341 | 6 | 2.449354  | -0.786539 | -7.333819 |
| 6 | 0.456809  | -3.003960 | -8.155735 | 6 | 1.528973  | -3.296085 | -7.852411 |
| 1 | -0.989183 | -1.847769 | -7.045164 | 1 | -0.046903 | -2.899283 | -6.430484 |
| 7 | 2.774112  | -2.431498 | -7.828056 | 7 | 3.126304  | -1.528076 | -8.210394 |
| 1 | 3.188111  | -0.872128 | -6.560766 | 1 | 2.841694  | 0.220624  | -7.175571 |
| 6 | 1.820808  | -3.177953 | -8.401782 | 6 | 2.666038  | -2.760847 | -8.462331 |
| 1 | -0.276176 | -3.631020 | -8.652862 | 1 | 1.193645  | -4.298580 | -8.097667 |
| 1 | 2.165637  | -3.946006 | -9.090269 | 1 | 3.231641  | -3.342725 | -9.186441 |
| 1 | 2.105891  | -0.867799 | -4.339017 | 1 | 2.434363  | 0.104624  | -4.751654 |



**Table S9.** Cartesian coordinates for *N*-methylhydroxylation by Cpd I. The geometries were optimized at the B3LYP/B1 level.

| <sup>4</sup> RC |           |           |           | <sup>2</sup> RC |           |           |           |
|-----------------|-----------|-----------|-----------|-----------------|-----------|-----------|-----------|
| 26              | 0.996103  | -1.199557 | -2.702327 | 26              | 0.991898  | -1.185692 | -2.688315 |
| 7               | 2.739162  | -0.191424 | -2.773370 | 7               | 2.734038  | -0.182044 | -2.760776 |
| 7               | 1.653044  | -2.412166 | -4.171298 | 7               | 1.651219  | -2.406504 | -4.160803 |
| 7               | -0.833283 | -2.045852 | -2.851942 | 7               | -0.839915 | -2.031680 | -2.844620 |
| 7               | 0.228452  | 0.221343  | -1.491098 | 7               | 0.225568  | 0.231635  | -1.482531 |
| 6               | 3.083605  | 0.909895  | -2.026772 | 6               | 3.080194  | 0.919469  | -2.015756 |
| 6               | 3.863376  | -0.533376 | -3.475929 | 6               | 3.858469  | -0.526695 | -3.463557 |
| 6               | 2.922462  | -2.444601 | -4.716655 | 6               | 2.922787  | -2.446235 | -4.696952 |
| 6               | 0.978702  | -3.480834 | -4.731424 | 6               | 0.979566  | -3.480688 | -4.711306 |
| 6               | -1.167773 | -3.168883 | -3.565043 | 6               | -1.171375 | -3.158516 | -3.553815 |
| 6               | -1.971291 | -1.680799 | -2.168760 | 6               | -1.978064 | -1.666919 | -2.163374 |
| 6               | -1.049971 | 0.290370  | -1.003117 | 6               | -1.055859 | 0.305109  | -1.000167 |
| 6               | 0.902710  | 1.275492  | -0.933069 | 6               | 0.898915  | 1.287729  | -0.925249 |
| 6               | 4.460520  | 1.267448  | -2.267882 | 6               | 4.456898  | 1.275984  | -2.258180 |
| 6               | 4.945908  | 0.369453  | -3.167391 | 6               | 4.941052  | 0.376620  | -3.157004 |
| 6               | 3.031005  | -3.530038 | -5.658589 | 6               | 3.036360  | -3.541145 | -5.627828 |
| 6               | 1.832002  | -4.171939 | -5.664757 | 6               | 1.836936  | -4.182370 | -5.633566 |
| 6               | -3.044120 | -2.599799 | -2.459448 | 6               | -3.049959 | -2.587682 | -2.452163 |
| 6               | -2.543156 | -3.528089 | -3.320915 | 6               | -2.546908 | -3.518106 | -3.310128 |
| 6               | -1.186754 | 1.413499  | -0.109370 | 6               | -1.194119 | 1.432172  | -0.111939 |
| 6               | 0.030095  | 2.026044  | -0.064197 | 6               | 0.023480  | 2.042680  | -0.063466 |
| 6               | 2.233947  | 1.598792  | -1.175317 | 6               | 2.230854  | 1.609056  | -1.164187 |
| 6               | 3.953428  | -1.582399 | -4.386901 | 6               | 3.951410  | -1.579482 | -4.369340 |
| 6               | -0.320106 | -3.851299 | -4.431755 | 6               | -0.321803 | -3.845934 | -4.414469 |
| 6               | -2.079993 | -0.591185 | -1.317779 | 6               | -2.086483 | -0.575187 | -1.314456 |
| 1               | 2.637081  | 2.466761  | -0.662911 | 1               | 2.634016  | 2.477065  | -0.651907 |
| 1               | 4.906970  | -1.731330 | -4.883612 | 1               | 4.907004  | -1.730139 | -4.861620 |
| 1               | -0.721139 | -4.722128 | -4.940722 | 1               | -0.722235 | -4.719899 | -4.918593 |
| 1               | -3.047813 | -0.409714 | -0.860484 | 1               | -3.054570 | -0.391215 | -0.858752 |
| 1               | 4.969853  | 2.104575  | -1.808411 | 1               | 4.967045  | 2.113346  | -1.800063 |
| 1               | 5.936370  | 0.315244  | -3.600202 | 1               | 5.931272  | 0.321327  | -3.590245 |
| 1               | 3.920062  | -3.758808 | -6.231810 | 1               | 3.928116  | -3.775962 | -6.194383 |
| 1               | 1.533508  | -5.034519 | -6.246351 | 1               | 1.540669  | -5.050356 | -6.208242 |
| 1               | -3.052073 | -4.366641 | -3.778535 | 1               | -3.054368 | -4.358851 | -3.765367 |
| 1               | -4.048259 | -2.521081 | -2.062877 | 1               | -4.054490 | -2.509037 | -2.056588 |
| 1               | -2.102240 | 1.692708  | 0.396109  | 1               | -2.111416 | 1.715216  | 0.388076  |
| 1               | 0.318753  | 2.914014  | 0.483433  | 1               | 0.310988  | 2.932453  | 0.481822  |
| 8               | 1.479226  | -2.157670 | -1.463552 | 8               | 1.472598  | -2.175099 | -1.474253 |
| 16              | 0.224274  | 0.009415  | -4.782757 | 16              | 0.221926  | 0.007309  | -4.788402 |
| 1               | 1.435118  | 0.368123  | -5.265753 | 1               | 1.434768  | 0.357285  | -5.272885 |
| 1               | 1.871918  | -5.848077 | -0.039316 | 1               | 1.874147  | -5.866681 | -0.044099 |
| 6               | 1.225796  | -4.967661 | -0.055384 | 6               | 1.228282  | -4.986154 | -0.063789 |
| 6               | -0.279828 | -5.260678 | 0.044567  | 6               | -0.277586 | -5.278454 | 0.037781  |

|   |           |           |           |   |           |           |           |
|---|-----------|-----------|-----------|---|-----------|-----------|-----------|
| 7 | 1.529883  | -4.115483 | 1.159535  | 7 | 1.533323  | -4.128791 | 1.147311  |
| 1 | 1.462590  | -4.337775 | -0.915453 | 1 | 1.464896  | -4.359931 | -0.926529 |
| 6 | -0.867385 | -4.150319 | 0.961013  | 6 | -0.863796 | -4.168233 | 0.955196  |
| 1 | -0.463610 | -6.251736 | 0.469328  | 1 | -0.461719 | -6.269663 | 0.461966  |
| 1 | -0.725270 | -5.243807 | -0.952538 | 1 | -0.723878 | -5.260465 | -0.958912 |
| 6 | 0.296769  | -3.194658 | 1.291270  | 6 | 0.299322  | -3.208875 | 1.277062  |
| 6 | 2.842837  | -3.397739 | 1.094477  | 6 | 2.845371  | -3.409940 | 1.076958  |
| 1 | -1.664889 | -3.588158 | 0.469840  | 1 | -1.665801 | -3.609541 | 0.467361  |
| 1 | -1.289435 | -4.579159 | 1.874336  | 1 | -1.279569 | -4.596665 | 1.871630  |
| 1 | 0.436070  | -2.480499 | 0.474942  | 1 | 0.435475  | -2.499574 | 0.455894  |
| 6 | 0.265667  | -2.489471 | 2.622780  | 6 | 0.270634  | -2.495480 | 2.604173  |
| 1 | 3.640199  | -4.138379 | 1.007375  | 1 | 3.643335  | -4.150100 | 0.991184  |
| 1 | 2.818747  | -2.746410 | 0.218905  | 1 | 2.818814  | -2.761950 | 0.198923  |
| 1 | 2.967177  | -2.818073 | 2.010157  | 1 | 2.970929  | -2.826645 | 1.990167  |
| 6 | 0.381781  | -1.095591 | 2.698944  | 6 | 0.387966  | -1.101198 | 2.671058  |
| 6 | 0.119329  | -3.191784 | 3.828941  | 6 | 0.125641  | -3.189817 | 3.815076  |
| 6 | 0.346151  | -0.482493 | 3.949506  | 6 | 0.354569  | -0.479890 | 3.917591  |
| 1 | 0.487231  | -0.501996 | 1.794232  | 1 | 0.493145  | -0.513882 | 1.762244  |
| 7 | 0.100673  | -2.619839 | 5.033530  | 7 | 0.109108  | -2.609949 | 5.015932  |
| 1 | 0.005155  | -4.277980 | 3.831216  | 1 | 0.010897  | -4.275879 | 3.824629  |
| 6 | 0.210134  | -1.285665 | 5.084096  | 6 | 0.219522  | -1.275554 | 5.057590  |
| 1 | 0.425322  | 0.595636  | 4.045958  | 1 | 0.434668  | 0.598791  | 4.006827  |
| 1 | 0.185560  | -0.842338 | 6.077136  | 1 | 0.196642  | -0.825703 | 6.047738  |
| 1 | 1.540204  | -4.721691 | 1.986850  | 1 | 1.545723  | -4.731580 | 1.977095  |

<sup>4</sup>TS<sub>H</sub>

|    |           |           |           |
|----|-----------|-----------|-----------|
| 26 | 0.716046  | -1.201520 | -2.776479 |
| 7  | 2.637167  | -0.642251 | -2.338460 |
| 7  | 1.407577  | -2.476711 | -4.152223 |
| 7  | -1.161532 | -1.715651 | -3.221417 |
| 7  | 0.052188  | 0.245880  | -1.534660 |
| 6  | 3.045089  | 0.354525  | -1.477095 |
| 6  | 3.787580  | -1.168458 | -2.875934 |
| 6  | 2.726032  | -2.756211 | -4.441696 |
| 6  | 0.660671  | -3.294616 | -4.965690 |
| 6  | -1.570728 | -2.643832 | -4.140354 |
| 6  | -2.309969 | -1.189312 | -2.683102 |
| 6  | -1.258492 | 0.512096  | -1.232153 |
| 6  | 0.801186  | 1.111960  | -0.773810 |
| 6  | 4.484498  | 0.438251  | -1.459408 |
| 6  | 4.945051  | -0.508506 | -2.323671 |
| 6  | 2.803531  | -3.763874 | -5.469468 |
| 6  | 1.524517  | -4.093466 | -5.798145 |
| 6  | -3.472461 | -1.829704 | -3.256212 |
| 6  | -3.013483 | -2.731354 | -4.163049 |
| 6  | -1.342433 | 1.580990  | -0.269931 |

<sup>2</sup>TS<sub>H</sub>

|    |           |           |           |
|----|-----------|-----------|-----------|
| 26 | 0.744871  | -1.145665 | -2.705426 |
| 7  | 2.629640  | -0.558667 | -2.317377 |
| 7  | 1.429720  | -2.398512 | -4.139335 |
| 7  | -1.153841 | -1.684400 | -3.179175 |
| 7  | 0.054531  | 0.256272  | -1.450819 |
| 6  | 3.033569  | 0.428871  | -1.445150 |
| 6  | 3.783060  | -1.048645 | -2.880906 |
| 6  | 2.747912  | -2.642088 | -4.465711 |
| 6  | 0.685125  | -3.271639 | -4.906763 |
| 6  | -1.550118 | -2.654175 | -4.057271 |
| 6  | -2.307026 | -1.170868 | -2.642232 |
| 6  | -1.259606 | 0.517318  | -1.163016 |
| 6  | 0.788196  | 1.140845  | -0.700643 |
| 6  | 4.470137  | 0.540784  | -1.442396 |
| 6  | 4.936564  | -0.379342 | -2.332939 |
| 6  | 2.828533  | -3.659196 | -5.485263 |
| 6  | 1.553721  | -4.049880 | -5.755148 |
| 6  | -3.462755 | -1.843691 | -3.192209 |
| 6  | -2.991551 | -2.769977 | -4.068462 |
| 6  | -1.359279 | 1.588984  | -0.204081 |

|    |           |           |           |    |           |           |           |
|----|-----------|-----------|-----------|----|-----------|-----------|-----------|
| 6  | -0.061318 | 1.955267  | 0.013407  | 6  | -0.083520 | 1.978027  | 0.082870  |
| 6  | 2.192224  | 1.167747  | -0.744729 | 6  | 2.177313  | 1.223996  | -0.693983 |
| 6  | 3.829836  | -2.168537 | -3.840693 | 6  | 3.839082  | -2.024383 | -3.875288 |
| 6  | -0.725610 | -3.375911 | -4.965102 | 6  | -0.693003 | -3.405186 | -4.857715 |
| 6  | -2.360782 | -0.155425 | -1.761748 | 6  | -2.358876 | -0.143064 | -1.712646 |
| 1  | 2.645651  | 1.916793  | -0.102795 | 1  | 2.628195  | 1.979328  | -0.057471 |
| 1  | 4.809119  | -2.492085 | -4.179653 | 1  | 4.823986  | -2.312138 | -4.230651 |
| 1  | -1.184434 | -4.068839 | -5.663258 | 1  | -1.143975 | -4.141877 | -5.515301 |
| 1  | -3.342531 | 0.171760  | -1.433549 | 1  | -3.341888 | 0.181724  | -1.385169 |
| 1  | 5.054377  | 1.145337  | -0.870375 | 1  | 5.034356  | 1.247030  | -0.847001 |
| 1  | 5.969610  | -0.734542 | -2.589773 | 1  | 5.961262  | -0.580991 | -2.617571 |
| 1  | 3.725879  | -4.153207 | -5.880691 | 1  | 3.749809  | -4.019229 | -5.924748 |
| 1  | 1.181029  | -4.811018 | -6.531885 | 1  | 1.214747  | -4.795497 | -6.462615 |
| 1  | -3.581035 | -3.391965 | -4.805452 | 1  | -3.550954 | -3.461942 | -4.684499 |
| 1  | -4.496574 | -1.593097 | -2.998309 | 1  | -4.489863 | -1.617568 | -2.936737 |
| 1  | -2.265933 | 1.989725  | 0.119680  | 1  | -2.288671 | 1.992519  | 0.176877  |
| 1  | 0.280861  | 2.733596  | 0.683441  | 1  | 0.247831  | 2.766178  | 0.746758  |
| 8  | 0.732863  | -2.412186 | -1.477371 | 8  | 0.751593  | -2.444711 | -1.482828 |
| 16 | 0.905351  | 0.364859  | -4.539712 | 16 | 0.561980  | 0.271325  | -4.649316 |
| 1  | 0.922854  | 1.502352  | -3.809124 | 1  | 1.874194  | 0.555899  | -4.812201 |
| 1  | 2.806560  | -5.491197 | -0.067429 | 1  | 2.733201  | -5.548987 | -0.083911 |
| 6  | 1.821927  | -5.034371 | 0.052235  | 6  | 1.757739  | -5.071721 | 0.031154  |
| 6  | 0.771741  | -5.920795 | 0.741108  | 6  | 0.685827  | -5.936821 | 0.714376  |
| 7  | 1.952684  | -3.821001 | 0.953160  | 7  | 1.910329  | -3.861511 | 0.934127  |
| 1  | 1.476118  | -4.640422 | -0.905427 | 1  | 1.424180  | -4.668298 | -0.926942 |
| 6  | -0.029302 | -4.977119 | 1.682621  | 6  | -0.090181 | -4.981884 | 1.665152  |
| 1  | 1.245033  | -6.725508 | 1.310660  | 1  | 1.138282  | -6.758923 | 1.275873  |
| 1  | 0.134162  | -6.389958 | -0.011479 | 1  | 0.035507  | -6.382055 | -0.041855 |
| 6  | 0.497693  | -3.552959 | 1.425161  | 6  | 0.460296  | -3.567086 | 1.407983  |
| 6  | 2.621199  | -2.669050 | 0.323054  | 6  | 2.598826  | -2.720909 | 0.304976  |
| 1  | -1.103821 | -5.005647 | 1.487170  | 1  | -1.166663 | -4.990510 | 1.478848  |
| 1  | 0.110118  | -5.261547 | 2.729275  | 1  | 0.053118  | -5.271883 | 2.709832  |
| 1  | 0.033624  | -3.125041 | 0.532417  | 1  | 0.004822  | -3.130434 | 0.514962  |
| 6  | 0.453908  | -2.568671 | 2.563887  | 6  | 0.436138  | -2.583271 | 2.547633  |
| 1  | 3.567129  | -2.930935 | -0.141577 | 1  | 3.539507  | -2.999645 | -0.160888 |
| 1  | 1.606562  | -2.334654 | -0.917151 | 1  | 1.621945  | -2.376429 | -0.902391 |
| 1  | 2.592304  | -1.776732 | 0.939837  | 1  | 2.588977  | -1.829919 | 0.924431  |
| 6  | -0.096748 | -1.293346 | 2.382058  | 6  | -0.094885 | -1.299251 | 2.368632  |
| 6  | 0.958215  | -2.879640 | 3.836150  | 6  | 0.939504  | -2.903383 | 3.818054  |
| 6  | -0.124477 | -0.410239 | 3.458838  | 6  | -0.105473 | -0.416911 | 3.446364  |
| 1  | -0.500310 | -1.001987 | 1.415772  | 1  | -0.496989 | -1.000566 | 1.404093  |
| 7  | 0.953011  | -2.038240 | 4.870827  | 7  | 0.950841  | -2.062996 | 4.853470  |
| 1  | 1.388758  | -3.861801 | 4.041234  | 1  | 1.355008  | -3.892475 | 4.021037  |
| 6  | 0.413660  | -0.827069 | 4.678468  | 6  | 0.429861  | -0.843307 | 4.663902  |
| 1  | -0.550403 | 0.582356  | 3.353862  | 1  | -0.516075 | 0.582247  | 3.342963  |
| 1  | 0.412890  | -0.163379 | 5.540398  | 1  | 0.442232  | -0.180561 | 5.526467  |

|                 |    |           |           |           |                 |    |           |           |           |
|-----------------|----|-----------|-----------|-----------|-----------------|----|-----------|-----------|-----------|
|                 | 1  | 2.479373  | -4.102337 | 1.792430  |                 | 1  | 2.434197  | -4.150701 | 1.772127  |
| <sup>4</sup> IM |    |           |           |           | <sup>2</sup> IM |    |           |           |           |
|                 | 26 | 0.924686  | -1.373322 | -2.853572 |                 | 26 | 0.922880  | -1.329670 | -2.843407 |
|                 | 7  | 2.385911  | -0.025381 | -2.469793 |                 | 7  | 2.375275  | 0.015920  | -2.482564 |
|                 | 7  | 2.235485  | -2.410617 | -3.977118 |                 | 7  | 2.240524  | -2.390617 | -3.958189 |
|                 | 7  | -0.543809 | -2.658095 | -3.331418 |                 | 7  | -0.548250 | -2.642928 | -3.300771 |
|                 | 7  | -0.417963 | -0.262324 | -1.831772 |                 | 7  | -0.417053 | -0.217302 | -1.846025 |
|                 | 6  | 2.268237  | 1.079528  | -1.663636 |                 | 6  | 2.257918  | 1.135954  | -1.696572 |
|                 | 6  | 3.675170  | -0.019283 | -2.926791 |                 | 6  | 3.668919  | 0.012966  | -2.937831 |
|                 | 6  | 3.553663  | -2.100323 | -4.256689 |                 | 6  | 3.558159  | -2.090348 | -4.232297 |
|                 | 6  | 1.999187  | -3.618635 | -4.590061 |                 | 6  | 2.003570  | -3.613094 | -4.545815 |
|                 | 6  | -0.405385 | -3.825185 | -4.039144 |                 | 6  | -0.400770 | -3.821782 | -3.984985 |
|                 | 6  | -1.891108 | -2.541671 | -3.059698 |                 | 6  | -1.890239 | -2.534050 | -3.021351 |
|                 | 6  | -1.764940 | -0.457803 | -1.730651 |                 | 6  | -1.765691 | -0.423719 | -1.734898 |
|                 | 6  | -0.144644 | 0.870661  | -1.112443 |                 | 6  | -0.151146 | 0.929180  | -1.144442 |
|                 | 6  | 3.521026  | 1.793447  | -1.605974 |                 | 6  | 3.510955  | 1.850485  | -1.650352 |
|                 | 6  | 4.396359  | 1.111876  | -2.397695 |                 | 6  | 4.387267  | 1.154781  | -2.426976 |
|                 | 6  | 4.144418  | -3.128820 | -5.078456 |                 | 6  | 4.153496  | -3.135466 | -5.029245 |
|                 | 6  | 3.186553  | -4.073553 | -5.275416 |                 | 6  | 3.194708  | -4.082578 | -5.214062 |
|                 | 6  | -2.610826 | -3.667556 | -3.606136 |                 | 6  | -2.604912 | -3.676977 | -3.539064 |
|                 | 6  | -1.687465 | -4.471368 | -4.200077 |                 | 6  | -1.677619 | -4.483738 | -4.124371 |
|                 | 6  | -2.365989 | 0.565410  | -0.909123 |                 | 6  | -2.369005 | 0.609310  | -0.927832 |
|                 | 6  | -1.352298 | 1.388840  | -0.514440 |                 | 6  | -1.360776 | 1.446772  | -0.551099 |
|                 | 6  | 1.102388  | 1.485660  | -1.021535 |                 | 6  | 1.092517  | 1.551173  | -1.061334 |
|                 | 6  | 4.221952  | -0.986541 | -3.775385 |                 | 6  | 4.221945  | -0.964929 | -3.765687 |
|                 | 6  | 0.785003  | -4.293625 | -4.587089 |                 | 6  | 0.791987  | -4.291282 | -4.529058 |
|                 | 6  | -2.463415 | -1.510146 | -2.329528 |                 | 6  | -2.462733 | -1.488730 | -2.307100 |
|                 | 1  | 1.161086  | 2.391339  | -0.424877 |                 | 1  | 1.148374  | 2.465488  | -0.477995 |
|                 | 1  | 5.261017  | -0.863899 | -4.065394 |                 | 1  | 5.262387  | -0.844305 | -4.051461 |
|                 | 1  | 0.745215  | -5.239147 | -5.119414 |                 | 1  | 0.756896  | -5.247787 | -5.041834 |
|                 | 1  | -3.541586 | -1.530512 | -2.198605 |                 | 1  | -3.539821 | -1.510155 | -2.167740 |
|                 | 1  | 3.690592  | 2.702243  | -1.043024 |                 | 1  | 3.679158  | 2.769380  | -1.103655 |
|                 | 1  | 5.431260  | 1.343642  | -2.613451 |                 | 1  | 5.422594  | 1.382632  | -2.644958 |
|                 | 1  | 5.163101  | -3.116583 | -5.443789 |                 | 1  | 5.174886  | -3.132808 | -5.387136 |
|                 | 1  | 3.256591  | -4.993509 | -5.841197 |                 | 1  | 3.267645  | -5.014115 | -5.760250 |
|                 | 1  | -1.846539 | -5.403540 | -4.726675 |                 | 1  | -1.831635 | -5.427581 | -4.631397 |
|                 | 1  | -3.682359 | -3.806965 | -3.541745 |                 | 1  | -3.674606 | -3.825117 | -3.464182 |
|                 | 1  | -3.422512 | 0.643957  | -0.686526 |                 | 1  | -3.425022 | 0.682769  | -0.701105 |
|                 | 1  | -1.409107 | 2.280539  | 0.096635  |                 | 1  | -1.421864 | 2.347131  | 0.046665  |
|                 | 8  | 1.375877  | -2.305651 | -1.314485 |                 | 8  | 1.375812  | -2.298792 | -1.330140 |
|                 | 16 | 0.355465  | -0.341536 | -4.930878 |                 | 16 | 0.357989  | -0.409241 | -4.971096 |
|                 | 1  | 1.561988  | 0.182154  | -5.243553 |                 | 1  | 1.561984  | 0.110719  | -5.300419 |
|                 | 1  | -1.496534 | -5.048154 | 0.288006  |                 | 1  | -1.503141 | -5.051951 | 0.254541  |
|                 | 6  | -1.125153 | -4.029208 | 0.411253  |                 | 6  | -1.129047 | -4.035181 | 0.387085  |
|                 | 6  | -2.046038 | -3.081753 | 1.183295  |                 | 6  | -2.044232 | -3.093988 | 1.172617  |

|   |           |           |           |   |           |           |           |
|---|-----------|-----------|-----------|---|-----------|-----------|-----------|
| 7 | 0.142898  | -4.067609 | 1.247427  | 7 | 0.141625  | -4.084733 | 1.218156  |
| 1 | -0.821527 | -3.624190 | -0.555772 | 1 | -0.828674 | -3.620595 | -0.576794 |
| 6 | -1.104738 | -2.086615 | 1.918316  | 6 | -1.097436 | -2.100337 | 1.902269  |
| 1 | -2.660811 | -3.636507 | 1.899378  | 1 | -2.649761 | -3.653945 | 1.892655  |
| 1 | -2.723974 | -2.576431 | 0.492694  | 1 | -2.730923 | -2.587348 | 0.491751  |
| 6 | 0.341870  | -2.551467 | 1.648813  | 6 | 0.347485  | -2.573031 | 1.633784  |
| 6 | 1.269738  | -4.680689 | 0.578283  | 6 | 1.264668  | -4.694854 | 0.539882  |
| 1 | -1.218927 | -1.067378 | 1.540025  | 1 | -1.206740 | -1.082478 | 1.518772  |
| 1 | -1.321694 | -2.061378 | 2.988993  | 1 | -1.313335 | -2.068426 | 2.972903  |
| 1 | 0.718813  | -2.125958 | 0.711962  | 1 | 0.730019  | -2.141392 | 0.702256  |
| 6 | 1.354572  | -2.418140 | 2.751459  | 6 | 1.356627  | -2.456588 | 2.741581  |
| 1 | 1.504826  | -4.247954 | -0.388224 | 1 | 1.493946  | -4.259795 | -0.426874 |
| 1 | 2.343792  | -2.223427 | -1.266716 | 1 | 2.343362  | -2.212769 | -1.280288 |
| 1 | 1.935951  | -5.283367 | 1.179909  | 1 | 1.937655  | -5.294390 | 1.137186  |
| 6 | 2.619033  | -1.873565 | 2.492220  | 6 | 2.625305  | -1.916544 | 2.493968  |
| 6 | 1.091582  | -2.841513 | 4.063191  | 6 | 1.085461  | -2.893174 | 4.047362  |
| 6 | 3.540774  | -1.775204 | 3.531341  | 6 | 3.543065  | -1.835402 | 3.538116  |
| 1 | 2.865804  | -1.525940 | 1.492081  | 1 | 2.878755  | -1.559000 | 1.499001  |
| 7 | 1.969631  | -2.769151 | 5.064790  | 7 | 1.959552  | -2.837542 | 5.053412  |
| 1 | 0.118866  | -3.259607 | 4.329025  | 1 | 0.108997  | -3.308231 | 4.304236  |
| 6 | 3.170567  | -2.240540 | 4.795729  | 6 | 3.164743  | -2.313020 | 4.795499  |
| 1 | 4.526446  | -1.350827 | 3.369179  | 1 | 4.531855  | -1.414956 | 3.385001  |
| 1 | 3.865729  | -2.186276 | 5.630665  | 1 | 3.856659  | -2.272491 | 5.633891  |
| 1 | -0.051737 | -4.579250 | 2.114567  | 1 | -0.051151 | -4.603780 | 2.081334  |

${}^4\text{TS}_{\text{reb}}$

|    |           |           |           |
|----|-----------|-----------|-----------|
| 26 | 1.089012  | -1.261155 | -2.725819 |
| 7  | 2.603336  | 0.024741  | -2.455608 |
| 7  | 2.259641  | -2.367842 | -3.942570 |
| 7  | -0.439031 | -2.520399 | -3.037266 |
| 7  | -0.027239 | -0.248922 | -1.378396 |
| 6  | 2.633272  | 1.086806  | -1.580441 |
| 6  | 3.830964  | 0.005849  | -3.076876 |
| 6  | 3.520272  | -2.043440 | -4.397267 |
| 6  | 1.891659  | -3.508061 | -4.622540 |
| 6  | -0.431604 | -3.650220 | -3.825247 |
| 6  | -1.717092 | -2.411135 | -2.532413 |
| 6  | -1.365106 | -0.429400 | -1.116498 |
| 6  | 0.350423  | 0.876140  | -0.685457 |
| 6  | 3.904257  | 1.759029  | -1.666305 |
| 6  | 4.642912  | 1.094396  | -2.598082 |
| 6  | 3.967608  | -3.025113 | -5.352138 |
| 6  | 2.963973  | -3.935183 | -5.485370 |
| 6  | -2.530046 | -3.494588 | -3.018597 |
| 6  | -1.731685 | -4.267083 | -3.811006 |
| 6  | -1.831185 | 0.583156  | -0.202608 |

${}^2\text{TS}_{\text{reb}}$

|    |           |           |           |
|----|-----------|-----------|-----------|
| 26 | 0.794924  | -1.198873 | -2.778773 |
| 7  | 2.502094  | -0.358611 | -2.145022 |
| 7  | 1.825910  | -2.352748 | -4.094977 |
| 7  | -0.922813 | -1.983015 | -3.502695 |
| 7  | -0.232300 | -0.025431 | -1.501985 |
| 6  | 2.653893  | 0.643963  | -1.208399 |
| 6  | 3.777816  | -0.678556 | -2.560006 |
| 6  | 3.188131  | -2.395592 | -4.247099 |
| 6  | 1.317611  | -3.196679 | -5.056415 |
| 6  | -1.078157 | -2.888465 | -4.515585 |
| 6  | -2.186442 | -1.694870 | -3.060245 |
| 6  | -1.594293 | 0.001234  | -1.345803 |
| 6  | 0.260760  | 0.924995  | -0.649564 |
| 6  | 4.049796  | 0.964925  | -1.041679 |
| 6  | 4.745557  | 0.142114  | -1.873239 |
| 6  | 3.550331  | -3.301412 | -5.312260 |
| 6  | 2.387572  | -3.793052 | -5.820029 |
| 6  | -3.165785 | -2.450565 | -3.805509 |
| 6  | -2.475233 | -3.191497 | -4.715412 |
| 6  | -1.968787 | 0.984561  | -0.355652 |

|    |           |           |           |    |           |           |           |
|----|-----------|-----------|-----------|----|-----------|-----------|-----------|
| 6  | -0.766638 | 1.388934  | 0.069793  | 6  | -0.812582 | 1.563007  | 0.075799  |
| 6  | 1.596936  | 1.483281  | -0.748021 | 6  | 1.612603  | 1.239853  | -0.510346 |
| 6  | 4.258716  | -0.941065 | -3.997689 | 6  | 4.096748  | -1.639039 | -3.511604 |
| 6  | 0.653712  | -4.127234 | -4.548820 | 6  | -0.034585 | -3.445389 | -5.255184 |
| 6  | -2.159845 | -1.434653 | -1.650086 | 6  | -2.499722 | -0.778741 | -2.060246 |
| 1  | 1.758030  | 2.364168  | -0.135067 | 1  | 1.872070  | 2.021231  | 0.197888  |
| 1  | 5.248269  | -0.815967 | -4.424490 | 1  | 5.149959  | -1.775505 | -3.738588 |
| 1  | 0.505068  | -5.023619 | -5.141913 | 1  | -0.302184 | -4.136982 | -6.048302 |
| 1  | -3.206004 | -1.456136 | -1.361560 | 1  | -3.552840 | -0.642508 | -1.832167 |
| 1  | 4.179984  | 2.629025  | -1.084452 | 1  | 4.432846  | 1.726160  | -0.374319 |
| 1  | 5.649908  | 1.303989  | -2.934687 | 1  | 5.815539  | 0.093668  | -2.029452 |
| 1  | 4.926248  | -3.001174 | -5.853865 | 1  | 4.563932  | -3.506692 | -5.631510 |
| 1  | 2.927584  | -4.808343 | -6.123891 | 1  | 2.250394  | -4.488316 | -6.638030 |
| 1  | -1.993052 | -5.163749 | -4.358265 | 1  | -2.860415 | -3.877136 | -5.458882 |
| 1  | -3.577896 | -3.631402 | -2.783367 | 1  | -4.235688 | -2.400680 | -3.649971 |
| 1  | -2.847681 | 0.664646  | 0.160371  | 1  | -2.985426 | 1.206946  | -0.057690 |
| 1  | -0.733395 | 2.271149  | 0.696365  | 1  | -0.685296 | 2.359040  | 0.798322  |
| 8  | 1.808405  | -2.359498 | -1.239161 | 8  | 0.828483  | -2.564428 | -1.496172 |
| 16 | 0.249505  | 0.021546  | -4.462839 | 16 | 0.839302  | 0.437290  | -4.457914 |
| 1  | 1.015280  | 1.116876  | -4.266540 | 1  | 0.869181  | 1.540975  | -3.677037 |
| 1  | 1.340723  | -5.851905 | -0.251281 | 1  | 3.087555  | -5.499686 | 0.530182  |
| 6  | 0.667694  | -4.994785 | -0.172142 | 6  | 2.040627  | -5.194828 | 0.464080  |
| 6  | -0.757677 | -5.326149 | 0.268441  | 6  | 1.060528  | -6.017663 | 1.291583  |
| 7  | 1.173904  | -4.074485 | 0.923122  | 7  | 1.893944  | -3.802864 | 1.033378  |
| 1  | 0.710658  | -4.394571 | -1.081461 | 1  | 1.747004  | -5.125599 | -0.585218 |
| 6  | -1.259278 | -4.062791 | 1.019828  | 6  | -0.159483 | -5.084063 | 1.460007  |
| 1  | -0.766488 | -6.199832 | 0.928880  | 1  | 1.502930  | -6.269865 | 2.262712  |
| 1  | -1.376187 | -5.565736 | -0.599483 | 1  | 0.808982  | -6.958511 | 0.796199  |
| 6  | -0.028965 | -3.148017 | 1.249035  | 6  | 0.365331  | -3.624627 | 1.339943  |
| 6  | 2.409666  | -3.362916 | 0.612451  | 6  | 2.468066  | -2.740873 | 0.211280  |
| 1  | -1.990662 | -3.509687 | 0.427047  | 1  | -0.889440 | -5.260658 | 0.664860  |
| 1  | -1.738500 | -4.328519 | 1.964421  | 1  | -0.668946 | -5.248512 | 2.411500  |
| 1  | 0.032414  | -2.386448 | 0.470323  | 1  | -0.003464 | -3.143503 | 0.432279  |
| 6  | 0.138061  | -2.532296 | 2.615191  | 6  | 0.187670  | -2.729468 | 2.538647  |
| 1  | 3.226098  | -4.002236 | 0.299430  | 1  | 3.380161  | -2.993929 | -0.310513 |
| 1  | 2.570296  | -2.746251 | -1.707296 | 1  | 0.979773  | -3.364806 | -2.029840 |
| 1  | 2.606417  | -2.501635 | 1.234259  | 1  | 2.269180  | -1.735909 | 0.549621  |
| 6  | 0.391685  | -1.163363 | 2.767835  | 6  | -0.371445 | -1.452283 | 2.410400  |
| 6  | 0.061216  | -3.309306 | 3.781906  | 6  | 0.574804  | -3.140326 | 3.824179  |
| 6  | 0.551808  | -0.646486 | 4.051960  | 6  | -0.514351 | -0.662739 | 3.549571  |
| 1  | 0.450114  | -0.515250 | 1.897353  | 1  | -0.697098 | -1.086962 | 1.440354  |
| 7  | 0.228554  | -2.830855 | 5.015028  | 7  | 0.459743  | -2.388736 | 4.919489  |
| 1  | -0.153503 | -4.378739 | 3.724872  | 1  | 0.994132  | -4.136226 | 3.985700  |
| 6  | 0.466908  | -1.518341 | 5.139649  | 6  | -0.080024 | -1.170772 | 4.775888  |
| 1  | 0.741152  | 0.410474  | 4.209929  | 1  | -0.952078 | 0.328484  | 3.488279  |
| 1  | 0.592952  | -1.150759 | 6.155603  | 1  | -0.170637 | -0.579375 | 5.684364  |

| <sup>4</sup> PC |           |           |           | <sup>2</sup> PC |           |           |           |
|-----------------|-----------|-----------|-----------|-----------------|-----------|-----------|-----------|
| 1               | 1.323054  | -4.648224 | 1.766582  | 1               | 2.353528  | -3.806570 | 1.956368  |
| 26              | 0.710402  | -0.804966 | -2.840956 | 26              | 0.721672  | -0.842804 | -2.758767 |
| 7               | 2.444007  | -0.169127 | -2.027680 | 7               | 2.454958  | -0.160557 | -2.008233 |
| 7               | 1.762845  | -2.280215 | -3.783649 | 7               | 1.748170  | -2.270471 | -3.764864 |
| 7               | -0.978717 | -1.815569 | -3.252388 | 7               | -0.967691 | -1.832397 | -3.174421 |
| 7               | -0.288674 | 0.239012  | -1.435807 | 7               | -0.257804 | 0.292104  | -1.438942 |
| 6               | 2.601728  | 0.858420  | -1.115893 | 6               | 2.635084  | 0.853181  | -1.084898 |
| 6               | 3.724485  | -0.499976 | -2.432379 | 6               | 3.724462  | -0.460982 | -2.465918 |
| 6               | 3.133349  | -2.288064 | -4.011940 | 6               | 3.107892  | -2.242550 | -4.050048 |
| 6               | 1.240904  | -3.205394 | -4.678254 | 6               | 1.224043  | -3.241001 | -4.609775 |
| 6               | -1.133609 | -2.841509 | -4.161407 | 6               | -1.138951 | -2.903133 | -4.029111 |
| 6               | -2.257330 | -1.477856 | -2.858642 | 6               | -2.243663 | -1.446975 | -2.819366 |
| 6               | -1.659287 | 0.321150  | -1.297326 | 6               | -1.628664 | 0.417357  | -1.335737 |
| 6               | 0.223967  | 1.227716  | -0.622568 | 6               | 0.261115  | 1.269727  | -0.612614 |
| 6               | 3.995366  | 1.162170  | -0.939488 | 6               | 4.032956  | 1.163540  | -0.938655 |
| 6               | 4.691247  | 0.320347  | -1.755538 | 6               | 4.708063  | 0.352779  | -1.799342 |
| 6               | 3.466052  | -3.255440 | -5.017681 | 6               | 3.430994  | -3.221544 | -5.049163 |
| 6               | 2.295795  | -3.822901 | -5.429220 | 6               | 2.266285  | -3.843290 | -5.390981 |
| 6               | -3.224397 | -2.311030 | -3.522161 | 6               | -3.224071 | -2.304661 | -3.437393 |
| 6               | -2.527389 | -3.156707 | -4.330680 | 6               | -2.538406 | -3.211367 | -4.183686 |
| 6               | -2.008644 | 1.366611  | -0.371074 | 6               | -1.971298 | 1.482685  | -0.428314 |
| 6               | -0.840012 | 1.930676  | 0.045749  | 6               | -0.798269 | 2.009437  | 0.022896  |
| 6               | 1.570454  | 1.517415  | -0.463896 | 6               | 1.612344  | 1.519482  | -0.427552 |
| 6               | 4.050138  | -1.478480 | -3.362183 | 6               | 4.027906  | -1.413476 | -3.429150 |
| 6               | -0.106031 | -3.485075 | -4.836434 | 6               | -0.120473 | -3.563255 | -4.699767 |
| 6               | -2.581428 | -0.480911 | -1.951938 | 6               | -2.555409 | -0.391520 | -1.977280 |
| 1               | 1.836843  | 2.322926  | 0.212730  | 1               | 1.888578  | 2.316359  | 0.255847  |
| 1               | 5.098381  | -1.602401 | -3.614256 | 1               | 5.068763  | -1.515259 | -3.720179 |
| 1               | -0.379411 | -4.251262 | -5.554454 | 1               | -0.401240 | -4.362167 | -5.378703 |
| 1               | -3.633205 | -0.309684 | -1.747046 | 1               | -3.606442 | -0.188713 | -1.796928 |
| 1               | 4.379746  | 1.929444  | -0.279815 | 1               | 4.430523  | 1.918548  | -0.272668 |
| 1               | 5.761948  | 0.257221  | -1.901431 | 1               | 5.773756  | 0.304660  | -1.983117 |
| 1               | 4.469735  | -3.457692 | -5.368680 | 1               | 4.425468  | -3.399567 | -5.437685 |
| 1               | 2.148318  | -4.583517 | -6.184964 | 1               | 2.114230  | -4.631728 | -6.116716 |
| 1               | -2.909013 | -3.924522 | -4.991079 | 1               | -2.928507 | -4.011752 | -4.798963 |
| 1               | -4.295453 | -2.242133 | -3.382728 | 1               | -4.294612 | -2.207629 | -3.310547 |
| 1               | -3.021534 | 1.634856  | -0.099375 | 1               | -2.982509 | 1.782653  | -0.184623 |
| 1               | -0.696886 | 2.758097  | 0.729038  | 1               | -0.648992 | 2.832541  | 0.710072  |
| 8               | 1.694188  | -3.888872 | -1.369495 | 8               | 1.837640  | -3.922523 | -1.377385 |
| 16              | 0.505771  | 0.729644  | -4.650088 | 16              | 0.564527  | 0.559889  | -4.457441 |
| 1               | 1.309653  | 1.679365  | -4.120292 | 1               | 0.910033  | 1.694387  | -3.805707 |
| 1               | 2.844908  | -5.893935 | 1.648831  | 1               | 2.823626  | -5.921605 | 1.704830  |
| 6               | 2.256380  | -5.610931 | 0.773018  | 6               | 2.282450  | -5.638024 | 0.799136  |
| 6               | 0.888146  | -6.294904 | 0.752140  | 6               | 0.913485  | -6.314605 | 0.709641  |

---

|   |           |           |           |   |           |           |           |
|---|-----------|-----------|-----------|---|-----------|-----------|-----------|
| 7 | 1.945777  | -4.114167 | 0.911619  | 7 | 1.973637  | -4.138928 | 0.917592  |
| 1 | 2.845074  | -5.760647 | -0.130954 | 1 | 2.916655  | -5.794069 | -0.072515 |
| 6 | 0.027310  | -5.402890 | 1.655639  | 6 | 0.012880  | -5.416310 | 1.566838  |
| 1 | 0.954522  | -7.326175 | 1.107998  | 1 | 0.956180  | -7.345472 | 1.070284  |
| 1 | 0.494760  | -6.307124 | -0.268577 | 1 | 0.572361  | -6.327036 | -0.329717 |
| 6 | 0.426595  | -3.975472 | 1.256369  | 6 | 0.441095  | -3.991232 | 1.188692  |
| 6 | 2.347753  | -3.305869 | -0.302466 | 6 | 2.440551  | -3.340088 | -0.281541 |
| 1 | -1.045837 | -5.550755 | 1.509146  | 1 | -1.052161 | -5.557395 | 1.364991  |
| 1 | 0.243020  | -5.588559 | 2.713699  | 1 | 0.172104  | -5.602748 | 2.634732  |
| 1 | -0.033342 | -3.725679 | 0.298296  | 1 | 0.028617  | -3.738287 | 0.209993  |
| 6 | 0.207595  | -2.868924 | 2.255184  | 6 | 0.180238  | -2.885260 | 2.178060  |
| 1 | 3.442865  | -3.372389 | -0.365434 | 1 | 3.536620  | -3.418597 | -0.288339 |
| 1 | 1.699213  | -3.287943 | -2.155725 | 1 | 1.801918  | -3.294282 | -2.141050 |
| 1 | 2.052055  | -2.267624 | -0.108504 | 1 | 2.146568  | -2.297720 | -0.108959 |
| 6 | -0.474551 | -1.699451 | 1.896767  | 6 | -0.486446 | -1.715477 | 1.792886  |
| 6 | 0.678034  | -2.966104 | 3.574851  | 6 | 0.593761  | -2.985017 | 3.516411  |
| 6 | -0.658476 | -0.705344 | 2.855220  | 6 | -0.711248 | -0.723107 | 2.744577  |
| 1 | -0.859311 | -1.570041 | 0.888187  | 1 | -0.827550 | -1.583606 | 0.769075  |
| 7 | 0.523743  | -2.015072 | 4.496408  | 7 | 0.400068  | -2.035949 | 4.432443  |
| 1 | 1.203856  | -3.860355 | 3.915000  | 1 | 1.104807  | -3.880003 | 3.876737  |
| 6 | -0.139299 | -0.908067 | 4.135875  | 6 | -0.247236 | -0.928350 | 4.045806  |
| 1 | -1.186183 | 0.209591  | 2.608414  | 1 | -1.227732 | 0.192389  | 2.476899  |
| 1 | -0.259327 | -0.151915 | 4.908576  | 1 | -0.400368 | -0.173695 | 4.814118  |
| 1 | 2.470772  | -3.732936 | 1.703817  | 1 | 2.463015  | -3.757451 | 1.732230  |



**Table S10.** Cartesian coordinates for *N*-(hydroxymethyl)normicotine decomposition.

| RC(protonated, without water) |           |           |           | RC(protonated, with water) |           |           |           |
|-------------------------------|-----------|-----------|-----------|----------------------------|-----------|-----------|-----------|
| 8                             | 2.004196  | -1.546953 | -0.736046 | 8                          | 1.783128  | -1.972624 | -1.140287 |
| 1                             | 0.184229  | -4.181180 | -2.007813 | 1                          | -0.240815 | -3.839625 | -1.676901 |
| 6                             | 0.060880  | -3.903829 | -0.959330 | 6                          | -0.108779 | -4.237792 | -0.670387 |
| 6                             | -0.669539 | -4.984693 | -0.154602 | 6                          | -0.423056 | -5.721477 | -0.503429 |
| 7                             | 1.458203  | -3.826736 | -0.341010 | 7                          | 1.351339  | -4.154867 | -0.296946 |
| 1                             | -0.401934 | -2.916326 | -0.916721 | 1                          | -0.657376 | -3.609694 | 0.037652  |
| 6                             | 0.453446  | -5.939552 | 0.270522  | 6                          | 0.366087  | -6.132008 | 0.758388  |
| 1                             | -1.441317 | -5.470139 | -0.756634 | 1                          | -0.081385 | -6.280714 | -1.382029 |
| 1                             | -1.159794 | -4.548088 | 0.722453  | 1                          | -1.497175 | -5.895477 | -0.404876 |
| 6                             | 1.600005  | -5.001767 | 0.673773  | 6                          | 1.581102  | -5.160331 | 0.856970  |
| 6                             | 1.816232  | -2.470539 | 0.268297  | 6                          | 1.865890  | -2.732630 | -0.009882 |
| 1                             | 0.176426  | -6.586859 | 1.106270  | 1                          | -0.252751 | -6.023571 | 1.653458  |
| 1                             | 0.757366  | -6.586216 | -0.559796 | 1                          | 0.697531  | -7.171012 | 0.717556  |
| 1                             | 1.370075  | -4.551818 | 1.645806  | 1                          | 1.509223  | -4.558964 | 1.767733  |
| 6                             | 3.005632  | -5.544334 | 0.681476  | 6                          | 2.961696  | -5.763659 | 0.763515  |
| 1                             | 1.214894  | -0.998551 | -0.866849 | 1                          | 0.941432  | -1.450824 | -1.128409 |
| 1                             | 1.019608  | -2.227984 | 0.979251  | 1                          | 1.265646  | -2.372828 | 0.834400  |
| 1                             | 2.761672  | -2.627826 | 0.792283  | 1                          | 2.909111  | -2.864017 | 0.289727  |
| 6                             | 3.813265  | -5.446438 | 1.821709  | 6                          | 3.940784  | -5.494810 | 1.727105  |
| 6                             | 3.553479  | -6.170063 | -0.449477 | 6                          | 3.310780  | -6.619932 | -0.292696 |
| 6                             | 5.103680  | -5.967129 | 1.782376  | 6                          | 5.198114  | -6.078783 | 1.594949  |
| 1                             | 3.435070  | -4.981619 | 2.729745  | 1                          | 3.720472  | -4.848988 | 2.574362  |
| 7                             | 4.791736  | -6.658634 | -0.504929 | 7                          | 4.513651  | -7.174393 | -0.438830 |
| 1                             | 2.965494  | -6.291574 | -1.361564 | 1                          | 2.580265  | -6.881929 | -1.061094 |
| 6                             | 5.547596  | -6.557823 | 0.596385  | 6                          | 5.436473  | -6.905135 | 0.494286  |
| 1                             | 5.754567  | -5.915610 | 2.648966  | 1                          | 5.978529  | -5.898537 | 2.326991  |
| 1                             | 6.551277  | -6.970060 | 0.525401  | 1                          | 6.407238  | -7.374804 | 0.354641  |
| 1                             | 2.154854  | -3.965847 | -1.080606 | 1                          | 1.899664  | -4.476457 | -1.103390 |
|                               |           |           |           | 1                          | -1.093545 | -0.513140 | -1.667372 |
|                               |           |           |           | 8                          | -0.596308 | -0.704545 | -0.855560 |
|                               |           |           |           | 1                          | -0.553182 | 0.145903  | -0.388595 |

| TS(protonated, without water) |           |           |           | TS(protonated, with water) |           |           |           |
|-------------------------------|-----------|-----------|-----------|----------------------------|-----------|-----------|-----------|
| 8                             | 3.134991  | -2.033867 | -1.131071 | 8                          | 2.724060  | -1.921414 | -1.299135 |
| 1                             | -0.833517 | -3.545201 | -1.376249 | 1                          | -1.026311 | -4.094960 | -1.468072 |
| 6                             | -0.491147 | -3.947870 | -0.419789 | 6                          | -0.676264 | -4.427678 | -0.485720 |
| 6                             | -0.968550 | -5.407404 | -0.147192 | 6                          | -1.030602 | -5.913114 | -0.178196 |
| 7                             | 0.998148  | -3.979113 | -0.389239 | 7                          | 0.807189  | -4.304157 | -0.406259 |
| 1                             | -0.833539 | -3.270972 | 0.369548  | 1                          | -1.116171 | -3.772041 | 0.276975  |
| 6                             | 0.307790  | -6.167157 | 0.303128  | 6                          | 0.284806  | -6.523065 | 0.369570  |
| 1                             | -1.402327 | -5.860864 | -1.042264 | 1                          | -1.365045 | -6.435809 | -1.078162 |
| 1                             | -1.740691 | -5.420430 | 0.626749  | 1                          | -1.843517 | -5.972564 | 0.550463  |
| 6                             | 1.308117  | -5.029622 | 0.617339  | 6                          | 1.184666  | -5.294652 | 0.647927  |

|   |          |           |           |   |           |           |           |
|---|----------|-----------|-----------|---|-----------|-----------|-----------|
| 6 | 3.306539 | -2.602744 | -0.002655 | 6 | 3.072814  | -2.601772 | -0.308255 |
| 1 | 0.139120 | -6.818441 | 1.164823  | 1 | 0.134520  | -7.128167 | 1.267639  |
| 1 | 0.704916 | -6.791493 | -0.505607 | 1 | 0.761413  | -7.166467 | -0.378278 |
| 1 | 1.037865 | -4.600706 | 1.592556  | 1 | 0.877144  | -4.849076 | 1.603441  |
| 6 | 2.779270 | -5.366608 | 0.649687  | 6 | 2.674987  | -5.537699 | 0.695792  |
| 1 | 2.226035 | -1.669780 | -1.216509 | 1 | 1.791447  | -1.443641 | -1.108125 |
| 1 | 2.588712 | -2.495353 | 0.800933  | 1 | 2.540101  | -2.534243 | 0.638254  |
| 1 | 4.284917 | -3.050419 | 0.140308  | 1 | 3.973980  | -3.205216 | -0.405614 |
| 6 | 3.468037 | -5.489889 | 1.869221  | 6 | 3.400110  | -5.390769 | 1.886374  |
| 6 | 3.532319 | -5.558606 | -0.526186 | 6 | 3.403152  | -5.898657 | -0.450776 |
| 6 | 4.828957 | -5.771311 | 1.861108  | 6 | 4.778633  | -5.589524 | 1.878851  |
| 1 | 2.935909 | -5.366732 | 2.809736  | 1 | 2.886989  | -5.128053 | 2.808947  |
| 7 | 4.846543 | -5.808208 | -0.549723 | 7 | 4.729037  | -6.066419 | -0.481714 |
| 1 | 3.056189 | -5.519995 | -1.506175 | 1 | 2.895454  | -6.064542 | -1.402208 |
| 6 | 5.476889 | -5.913900 | 0.625083  | 6 | 5.398818  | -5.916049 | 0.668699  |
| 1 | 5.385898 | -5.876386 | 2.786779  | 1 | 5.364500  | -5.490644 | 2.787266  |
| 1 | 6.543058 | -6.124249 | 0.579992  | 1 | 6.475007  | -6.065739 | 0.619061  |
| 1 | 1.304478 | -4.332153 | -1.299414 | 1 | 1.178350  | -4.656045 | -1.291836 |
|   |          |           |           | 1 | -0.044992 | -1.891754 | -0.558497 |
|   |          |           |           | 8 | 0.497180  | -1.083251 | -0.602196 |
|   |          |           |           | 1 | -0.017675 | -0.400448 | -1.065165 |

PC(protonated, without water)

|   |           |           |           |
|---|-----------|-----------|-----------|
| 8 | 0.879766  | 2.374659  | -1.924095 |
| 1 | 2.682295  | 0.447050  | 1.747484  |
| 6 | 2.605818  | 0.544718  | 0.662648  |
| 6 | 3.025363  | -0.739869 | -0.059183 |
| 7 | 1.126850  | 0.700941  | 0.321546  |
| 1 | 3.136176  | 1.443963  | 0.346238  |
| 6 | 1.763527  | -1.610944 | 0.001571  |
| 1 | 3.889393  | -1.201721 | 0.424695  |
| 1 | 3.299001  | -0.523095 | -1.097545 |
| 6 | 0.617888  | -0.633918 | -0.306366 |
| 6 | 0.714278  | 3.500340  | -2.355844 |
| 1 | 1.771077  | -2.430119 | -0.721685 |
| 1 | 1.638693  | -2.051139 | 0.996847  |
| 1 | 0.591632  | -0.424303 | -1.378922 |
| 6 | -0.764504 | -0.976417 | 0.184663  |
| 1 | 0.982528  | 1.469381  | -0.362802 |
| 1 | 0.581346  | 4.371960  | -1.691213 |
| 1 | 0.691179  | 3.693069  | -3.440879 |
| 6 | -1.854026 | -1.005277 | -0.694116 |
| 6 | -1.011039 | -1.278655 | 1.532875  |
| 6 | -3.112809 | -1.334221 | -0.199360 |
| 1 | -1.716668 | -0.782407 | -1.749730 |
| 7 | -2.214098 | -1.577758 | 2.023223  |

PC(protonated, with water)

|   |           |           |           |
|---|-----------|-----------|-----------|
| 8 | 2.776956  | -2.383436 | -1.021119 |
| 1 | -0.367646 | -4.703499 | -2.023387 |
| 6 | -0.667371 | -4.522869 | -0.988826 |
| 6 | -1.158517 | -5.804393 | -0.306014 |
| 7 | 0.578300  | -4.131418 | -0.210748 |
| 1 | -1.375539 | -3.693128 | -0.966019 |
| 6 | 0.138852  | -6.473510 | 0.168099  |
| 1 | -1.735888 | -6.426956 | -0.993755 |
| 1 | -1.803680 | -5.562511 | 0.545932  |
| 6 | 0.978856  | -5.305214 | 0.711645  |
| 6 | 3.918087  | -2.311590 | -1.442053 |
| 1 | -0.021981 | -7.228476 | 0.941645  |
| 1 | 0.655571  | -6.961193 | -0.666347 |
| 1 | 0.612055  | -5.021673 | 1.702015  |
| 6 | 2.476740  | -5.479607 | 0.758395  |
| 1 | 1.586007  | -1.422743 | 0.446115  |
| 1 | 4.510727  | -1.387456 | -1.336502 |
| 1 | 4.406060  | -3.166571 | -1.938104 |
| 6 | 3.181197  | -5.386185 | 1.962633  |
| 6 | 3.217394  | -5.727591 | -0.406227 |
| 6 | 4.565375  | -5.545619 | 1.951103  |
| 1 | 2.656044  | -5.193605 | 2.895059  |
| 7 | 4.545671  | -5.846763 | -0.439465 |

|   |           |           |           |   |          |           |           |
|---|-----------|-----------|-----------|---|----------|-----------|-----------|
| 1 | -0.197851 | -1.285972 | 2.261252  | 1 | 2.717062 | -5.829879 | -1.371159 |
| 6 | -3.241821 | -1.607448 | 1.164803  | 6 | 5.201272 | -5.763268 | 0.727654  |
| 1 | -3.978154 | -1.375494 | -0.852780 | 1 | 5.142197 | -5.490705 | 2.868626  |
| 1 | -4.210192 | -1.862491 | 1.588865  | 1 | 6.281903 | -5.875279 | 0.677017  |
| 1 | 0.572433  | 0.921981  | 1.152999  | 1 | 1.362775 | -3.882091 | -0.829315 |
|   |           |           |           | 1 | 0.447777 | -3.253509 | 0.346597  |
|   |           |           |           | 8 | 0.863532 | -1.718027 | 1.029516  |
|   |           |           |           | 1 | 0.310162 | -0.940076 | 1.197767  |

RC(deprotonated, without water)

|   |           |           |           |
|---|-----------|-----------|-----------|
| 8 | -0.932635 | 2.156746  | -1.935013 |
| 1 | -1.223574 | 4.662546  | -2.971048 |
| 6 | -1.139461 | 4.280780  | -3.991312 |
| 6 | -0.422642 | 5.231244  | -4.959298 |
| 7 | -0.306291 | 3.074659  | -4.018562 |
| 1 | -2.164432 | 4.061094  | -4.350422 |
| 6 | 0.259761  | 4.285364  | -5.983097 |
| 1 | 0.329815  | 5.819976  | -4.425638 |
| 1 | -1.117104 | 5.933745  | -5.429490 |
| 6 | 0.021795  | 2.845386  | -5.435010 |
| 6 | -0.881394 | 1.936869  | -3.328251 |
| 1 | -0.156174 | 4.382097  | -6.990599 |
| 1 | 1.331491  | 4.490410  | -6.055331 |
| 1 | -0.848313 | 2.413024  | -5.968403 |
| 6 | 1.199326  | 1.912087  | -5.630576 |
| 1 | -0.023442 | 2.362320  | -1.660849 |
| 1 | -1.927327 | 1.748235  | -3.627710 |
| 1 | -0.283567 | 1.049701  | -3.582077 |
| 6 | 1.192569  | 0.917968  | -6.611521 |
| 6 | 2.363649  | 2.037639  | -4.857298 |
| 6 | 2.321321  | 0.117537  | -6.784436 |
| 1 | 0.310789  | 0.772196  | -7.232416 |
| 7 | 3.453894  | 1.278246  | -5.004938 |
| 1 | 2.401189  | 2.789879  | -4.071621 |
| 6 | 3.423300  | 0.337657  | -5.959193 |
| 1 | 2.345117  | -0.663954 | -7.538413 |
| 1 | 4.322202  | -0.267925 | -6.063559 |

RC(deprotonated, with water)

|   |           |           |           |
|---|-----------|-----------|-----------|
| 8 | 0.189216  | 1.801862  | -1.742791 |
| 1 | 0.348425  | 4.472224  | -2.052897 |
| 6 | -0.385079 | 4.435055  | -2.860359 |
| 6 | -0.209365 | 5.524370  | -3.925581 |
| 7 | -0.240279 | 3.183895  | -3.624305 |
| 1 | -1.390557 | 4.492781  | -2.403605 |
| 6 | -0.754940 | 4.876825  | -5.225980 |
| 1 | 0.850168  | 5.774145  | -4.039489 |
| 1 | -0.736352 | 6.444584  | -3.657323 |
| 6 | -1.034050 | 3.389904  | -4.856711 |
| 6 | -0.626048 | 1.986034  | -2.861442 |
| 1 | -1.672408 | 5.354712  | -5.582192 |
| 1 | -0.024452 | 4.941594  | -6.037246 |
| 1 | -2.109794 | 3.287438  | -4.618896 |
| 6 | -0.705093 | 2.392741  | -5.949483 |
| 1 | 1.108620  | 1.710067  | -2.079237 |
| 1 | -1.659124 | 2.079805  | -2.485624 |
| 1 | -0.589596 | 1.134263  | -3.558466 |
| 6 | -1.690885 | 1.598805  | -6.540607 |
| 6 | 0.605819  | 2.234539  | -6.425395 |
| 6 | -1.339078 | 0.704715  | -7.551459 |
| 1 | -2.724124 | 1.678960  | -6.209330 |
| 7 | 0.965798  | 1.377066  | -7.384947 |
| 1 | 1.410617  | 2.834835  | -6.003225 |
| 6 | -0.000864 | 0.628276  | -7.934095 |
| 1 | -2.084841 | 0.075337  | -8.028084 |
| 1 | 0.313785  | -0.062337 | -8.714549 |
| 1 | 2.556988  | 1.490902  | -4.053236 |
| 8 | 2.423159  | 2.176574  | -3.380726 |
| 1 | 1.649079  | 2.694902  | -3.706878 |

TS(deprotonated, without water)

|   |           |          |           |
|---|-----------|----------|-----------|
| 8 | 0.165789  | 2.320451 | -2.013782 |
| 1 | -1.377401 | 4.753594 | -3.116704 |
| 6 | -1.305680 | 4.269964 | -4.093849 |
| 6 | -0.683233 | 5.144596 | -5.203255 |

TS(deprotonated, with water)

|   |           |          |           |
|---|-----------|----------|-----------|
| 8 | 0.274949  | 1.765778 | -1.756156 |
| 1 | 0.534867  | 4.430096 | -2.142188 |
| 6 | -0.255154 | 4.445739 | -2.892389 |
| 6 | -0.064937 | 5.453693 | -4.025447 |

|   |           |           |           |   |           |          |           |
|---|-----------|-----------|-----------|---|-----------|----------|-----------|
| 7 | -0.394285 | 3.102700  | -3.978965 | 7 | -0.263100 | 3.139827 | -3.605790 |
| 1 | -2.302641 | 3.914251  | -4.378776 | 1 | -1.222270 | 4.571488 | -2.388786 |
| 6 | 0.304239  | 4.201406  | -5.942625 | 6 | -0.876263 | 4.854205 | -5.200038 |
| 1 | -0.156477 | 6.004903  | -4.781226 | 1 | 0.997186  | 5.516042 | -4.285042 |
| 1 | -1.458530 | 5.534146  | -5.869139 | 1 | -0.399071 | 6.457475 | -3.748282 |
| 6 | 0.014220  | 2.788946  | -5.376424 | 6 | -1.060728 | 3.338989 | -4.858315 |
| 6 | -0.776379 | 2.002901  | -2.927948 | 6 | -0.667223 | 1.932591 | -2.688053 |
| 1 | 0.190355  | 4.227176  | -7.029806 | 1 | -1.857595 | 5.329305 | -5.294369 |
| 1 | 1.341109  | 4.467440  | -5.714621 | 1 | -0.363269 | 4.981686 | -6.156491 |
| 1 | -0.873261 | 2.381657  | -5.884181 | 1 | -2.108711 | 3.155474 | -4.588248 |
| 6 | 1.157292  | 1.807855  | -5.539184 | 6 | -0.677091 | 2.374442 | -5.960315 |
| 1 | 0.404602  | 3.200606  | -3.080202 | 1 | 1.312919  | 1.874614 | -2.389736 |
| 1 | -1.835288 | 2.166328  | -2.644345 | 1 | -1.661766 | 2.193552 | -2.283298 |
| 1 | -0.695834 | 1.022962  | -3.439482 | 1 | -0.792471 | 1.107766 | -3.421091 |
| 6 | 1.442334  | 1.335691  | -6.827226 | 6 | -1.636561 | 1.565859 | -6.575314 |
| 6 | 1.980303  | 1.365017  | -4.491981 | 6 | 0.641778  | 2.277376 | -6.433644 |
| 6 | 2.524831  | 0.485377  | -7.023075 | 6 | -1.254334 | 0.717419 | -7.612845 |
| 1 | 0.819955  | 1.632850  | -7.669297 | 1 | -2.672266 | 1.600037 | -6.244266 |
| 7 | 3.026794  | 0.544442  | -4.671463 | 7 | 1.025727  | 1.465253 | -7.422512 |
| 1 | 1.771260  | 1.650583  | -3.461139 | 1 | 1.432932  | 2.874245 | -5.981720 |
| 6 | 3.291460  | 0.127306  | -5.912231 | 6 | 0.085597  | 0.703940 | -7.997890 |
| 1 | 2.769425  | 0.105372  | -8.010651 | 1 | -1.977533 | 0.077562 | -8.109414 |
| 1 | 4.151660  | -0.531205 | -6.024393 | 1 | 0.423644  | 0.053710 | -8.802756 |
|   |           |           |           | 1 | 2.367306  | 1.511241 | -3.781668 |
|   |           |           |           | 8 | 2.075252  | 2.280576 | -3.268212 |
|   |           |           |           | 1 | 0.814615  | 2.853038 | -3.765993 |

PC(deprotonated, without water)

|   |           |          |           |
|---|-----------|----------|-----------|
| 8 | 0.116699  | 1.683053 | -1.296698 |
| 1 | -1.199595 | 4.900912 | -3.290784 |
| 6 | -1.199095 | 4.357349 | -4.239758 |
| 6 | -0.681267 | 5.199749 | -5.441536 |
| 7 | -0.340853 | 3.163511 | -4.135422 |
| 1 | -2.227233 | 4.023709 | -4.427647 |
| 6 | 0.238887  | 4.226965 | -6.222537 |
| 1 | -0.121860 | 6.076449 | -5.099697 |
| 1 | -1.510029 | 5.567853 | -6.055129 |
| 6 | 0.015255  | 2.848036 | -5.531119 |
| 6 | -0.911411 | 1.567633 | -1.925199 |
| 1 | 0.011022  | 4.198851 | -7.292981 |
| 1 | 1.291251  | 4.515597 | -6.121115 |
| 1 | -0.883152 | 2.392053 | -5.976340 |
| 6 | 1.163725  | 1.871201 | -5.677531 |
| 1 | 0.511067  | 3.415200 | -3.631002 |
| 1 | -1.789220 | 2.223578 | -1.750916 |
| 1 | -1.061932 | 0.778883 | -2.686456 |

PC(deprotonated, with water)

|   |           |          |           |
|---|-----------|----------|-----------|
| 8 | 0.462464  | 1.239041 | -1.578674 |
| 1 | 0.158010  | 4.653225 | -2.141896 |
| 6 | -0.542596 | 4.629069 | -2.980828 |
| 6 | -0.283527 | 5.732108 | -4.043272 |
| 7 | -0.446118 | 3.336908 | -3.678245 |
| 1 | -1.556373 | 4.728842 | -2.571066 |
| 6 | -0.562355 | 5.034039 | -5.401579 |
| 1 | 0.753675  | 6.079053 | -3.995080 |
| 1 | -0.924137 | 6.605644 | -3.883618 |
| 6 | -1.026113 | 3.595165 | -5.014619 |
| 6 | -0.566613 | 1.202386 | -2.230895 |
| 1 | -1.321333 | 5.548898 | -5.999946 |
| 1 | 0.346524  | 4.986443 | -6.009867 |
| 1 | -2.117454 | 3.615094 | -4.883888 |
| 6 | -0.696524 | 2.507743 | -6.014179 |
| 1 | 1.916644  | 1.652178 | -2.735734 |
| 1 | -1.535252 | 1.522911 | -1.807762 |
| 1 | -0.615868 | 0.763576 | -3.241847 |

---

|   |          |           |           |   |           |           |           |
|---|----------|-----------|-----------|---|-----------|-----------|-----------|
| 6 | 1.711739 | 1.618542  | -6.942593 | 6 | -1.694532 | 1.724384  | -6.600009 |
| 6 | 1.721214 | 1.175362  | -4.594637 | 6 | 0.628059  | 2.227089  | -6.386975 |
| 6 | 2.764139 | 0.718070  | -7.070782 | 6 | -1.343233 | 0.722350  | -7.504041 |
| 1 | 1.315754 | 2.123172  | -7.820681 | 1 | -2.738536 | 1.898604  | -6.348421 |
| 7 | 2.739173 | 0.308654  | -4.702229 | 7 | 0.986994  | 1.261553  | -7.239774 |
| 1 | 1.336223 | 1.312641  | -3.587121 | 1 | 1.446779  | 2.806579  | -5.964188 |
| 6 | 3.244329 | 0.091230  | -5.919489 | 6 | 0.007865  | 0.527225  | -7.785748 |
| 1 | 3.205996 | 0.506229  | -8.040233 | 1 | -2.099594 | 0.101637  | -7.975586 |
| 1 | 4.069201 | -0.617497 | -5.978353 | 1 | 0.322676  | -0.250965 | -8.479119 |
|   |          |           |           | 1 | 2.496266  | 1.383581  | -4.137666 |
|   |          |           |           | 8 | 2.347389  | 2.095240  | -3.496761 |
|   |          |           |           | 1 | 0.543024  | 3.081123  | -3.775443 |
